# Supplementary material for: A new class of platinum(ii) complexes with the phosphine ligand pta which show potent anticancer activity
Source: Royal Society of Chemistry journal article supplement (doi:10.1039/c7qi00299h), 2017-10-17
Supplement: c7qi00299h1.pdf [file c7qi00299h1.pdf]

*Supporting Information for*

# A new class of platinum(II) complexes with phosphine ligand pta which show potent anticancer activity

M. D. Živković,<sup>a</sup> J. Kljun,<sup>b</sup> T. Ilić-Tomić,<sup>c</sup> A. Pavić,<sup>c</sup> A. Veselinović,<sup>d</sup> D. D. Manojlović,<sup>e</sup> J. Nikodinović-Runić,<sup>\*c</sup> and I. Turel<sup>\*b</sup>

<sup>a</sup> Dr. M. D. Živković University of Kragujevac, Faculty of Medical Sciences, Department of Pharmacy Svetozara Markovića 69, 34000 Kragujevac, Serbia

<sup>b</sup> Dr. J. Kljun, Dr. Iztok Turel\*, University of Ljubljana, Department of Chemistry and Biochemistry, Faculty of Chemistry and Chemical Technology, Večna pot 113, SI-1000 Ljubljana, Slovenia, E-mail: iztok.turel@fkkt.uni-lj.si

<sup>c</sup> Dr. T. Ilić-Tomić, Dr. A. Pavić, Dr. J. Nikodinović-Runić\*, University of Belgrade, Institute of Molecular Genetics and Genetic Engineering, Vojvode Stepe 444a, 11000 Belgrade, Serbia, E-mail: jasmina.nikodinovic@gmail.com; jasmina.nikodinovic@imgge.bg.ac.rs;

<sup>d</sup> Dr. A. Veselinović, University of Niš, Department of Chemistry Faculty of Medicine, 18000 Niš, Serbia

<sup>e</sup> Dr. D. D. Manojlović, University of Belgrade, Department of Analytical Chemistry, Faculty of Chemistry, Studentski trg 12-16, 11000 Belgrade, Serbia

## Contents:

**<sup>1</sup>H NMR spectra for complexes 1a-8a and 1b-8b.**

**Figure S1.** A mixture of  $\alpha$  and  $\beta$  isomer of complex **2a** evidenced in the <sup>1</sup>H NMR spectrum.

**Figure S2.** Three crystallographically independent molecules of complex **6a**.

**Figure S3.** Stability of complexes **1b** and **4a** in dmso solution over a period of 7 days followed by <sup>1</sup>H NMR spectroscopy.

**Figure S4.** Reactivity of complex **1a** towards GMP in dmso-d<sub>6</sub>/D<sub>2</sub>O 9:1.

**Figure S5.** Reactivity of complex **1b** towards GMP in dmso-d<sub>6</sub>/D<sub>2</sub>O 9:1.

**Figure S6.** Visual appearance of **8a** and **8b** in comparison to **7a** showing bright orange color of these two complexes in comparison to yellow or pale yellow of all other complexes.

**Figure S7.** Cellular DNA degradation in **A)** carcinoma A549 cells and **B)** zebrafish embryos, induced by complexes **1a**, **1b**, **3a**, **3b**, **5a** and **5b** in comparison to cisplatin (**Cis**) and dmso treated cells.

**Table S1.** Compound nomenclature according to IUPAC recommendations.

**Table S2.** Crystallographic data for compounds **1b**,  $\alpha$ -**2a**, and  $\beta$ -**2a**.

**Table S3.** Crystallographic data for compounds **4b** and **6a**.

**Table S4.** Instrument operating conditions for ICP-QMS

**Table S5.** Lethal and teratogenic effects observed in zebrafish (*Danio rerio*) embryos at different hours post fertilization (hpf).



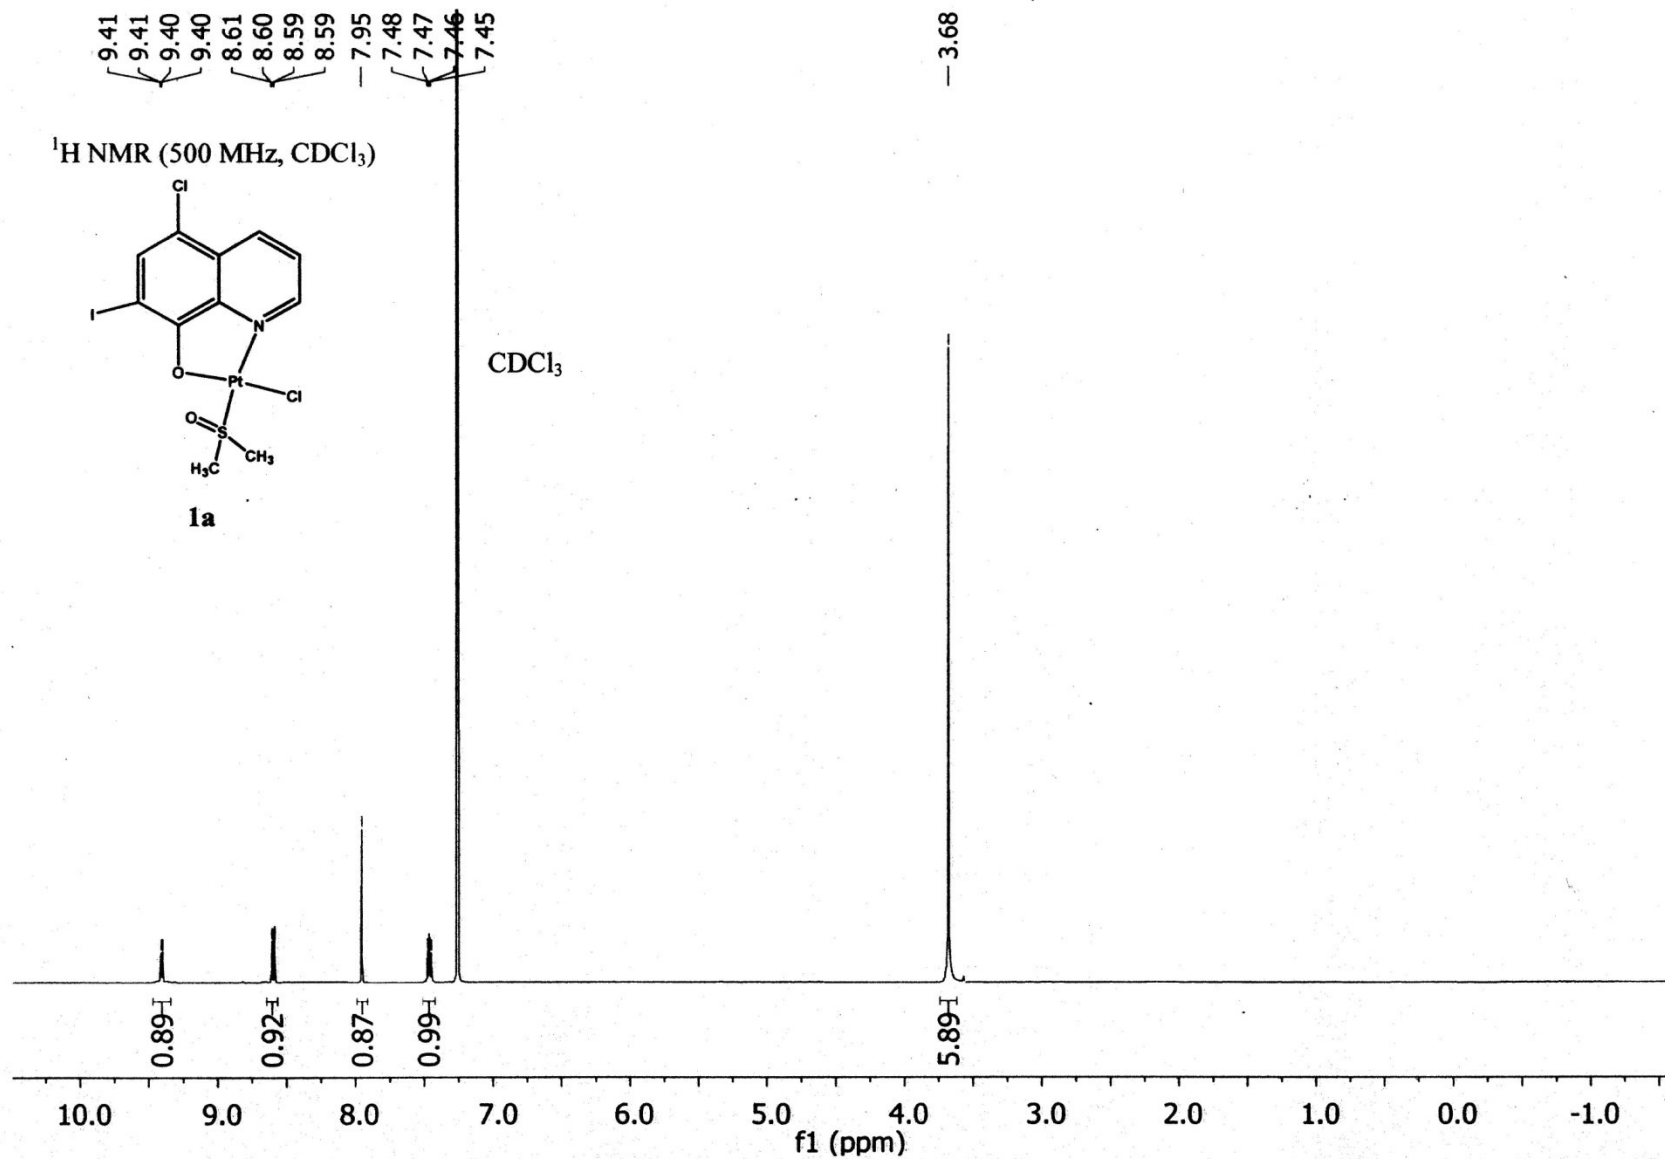

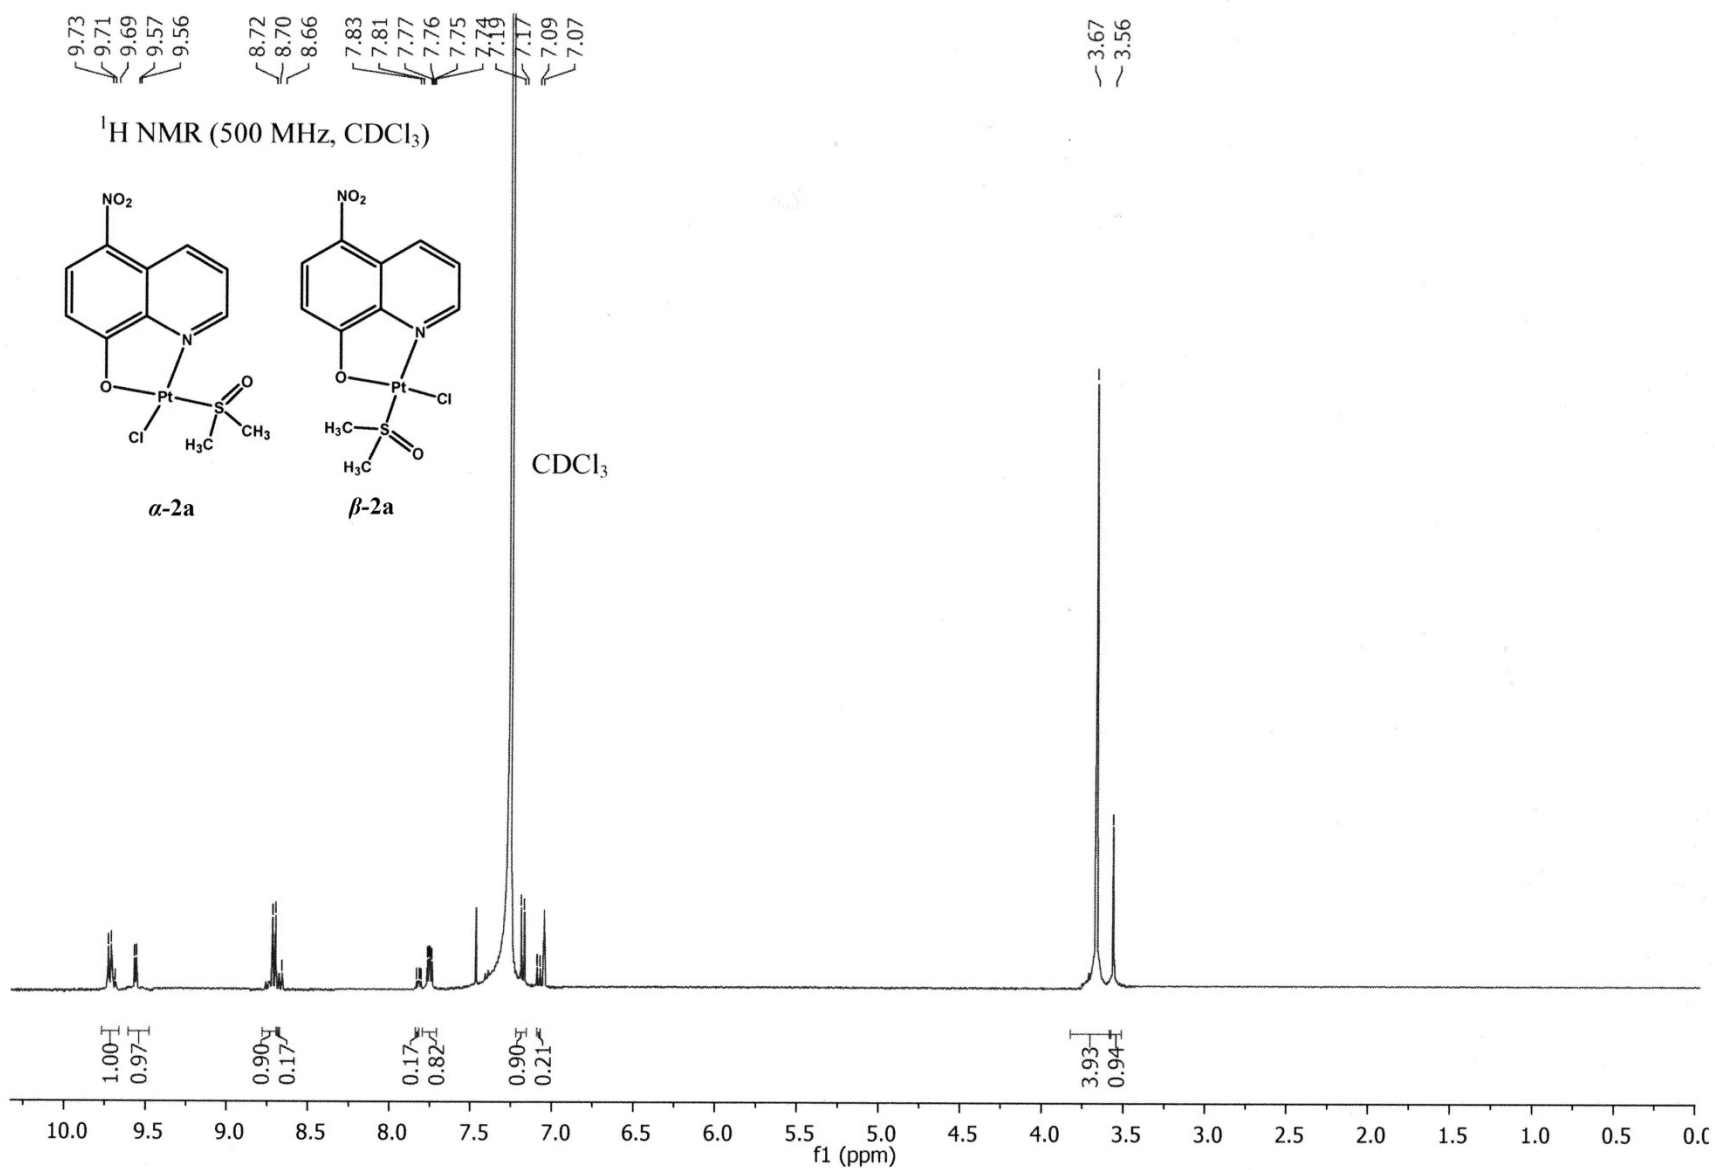

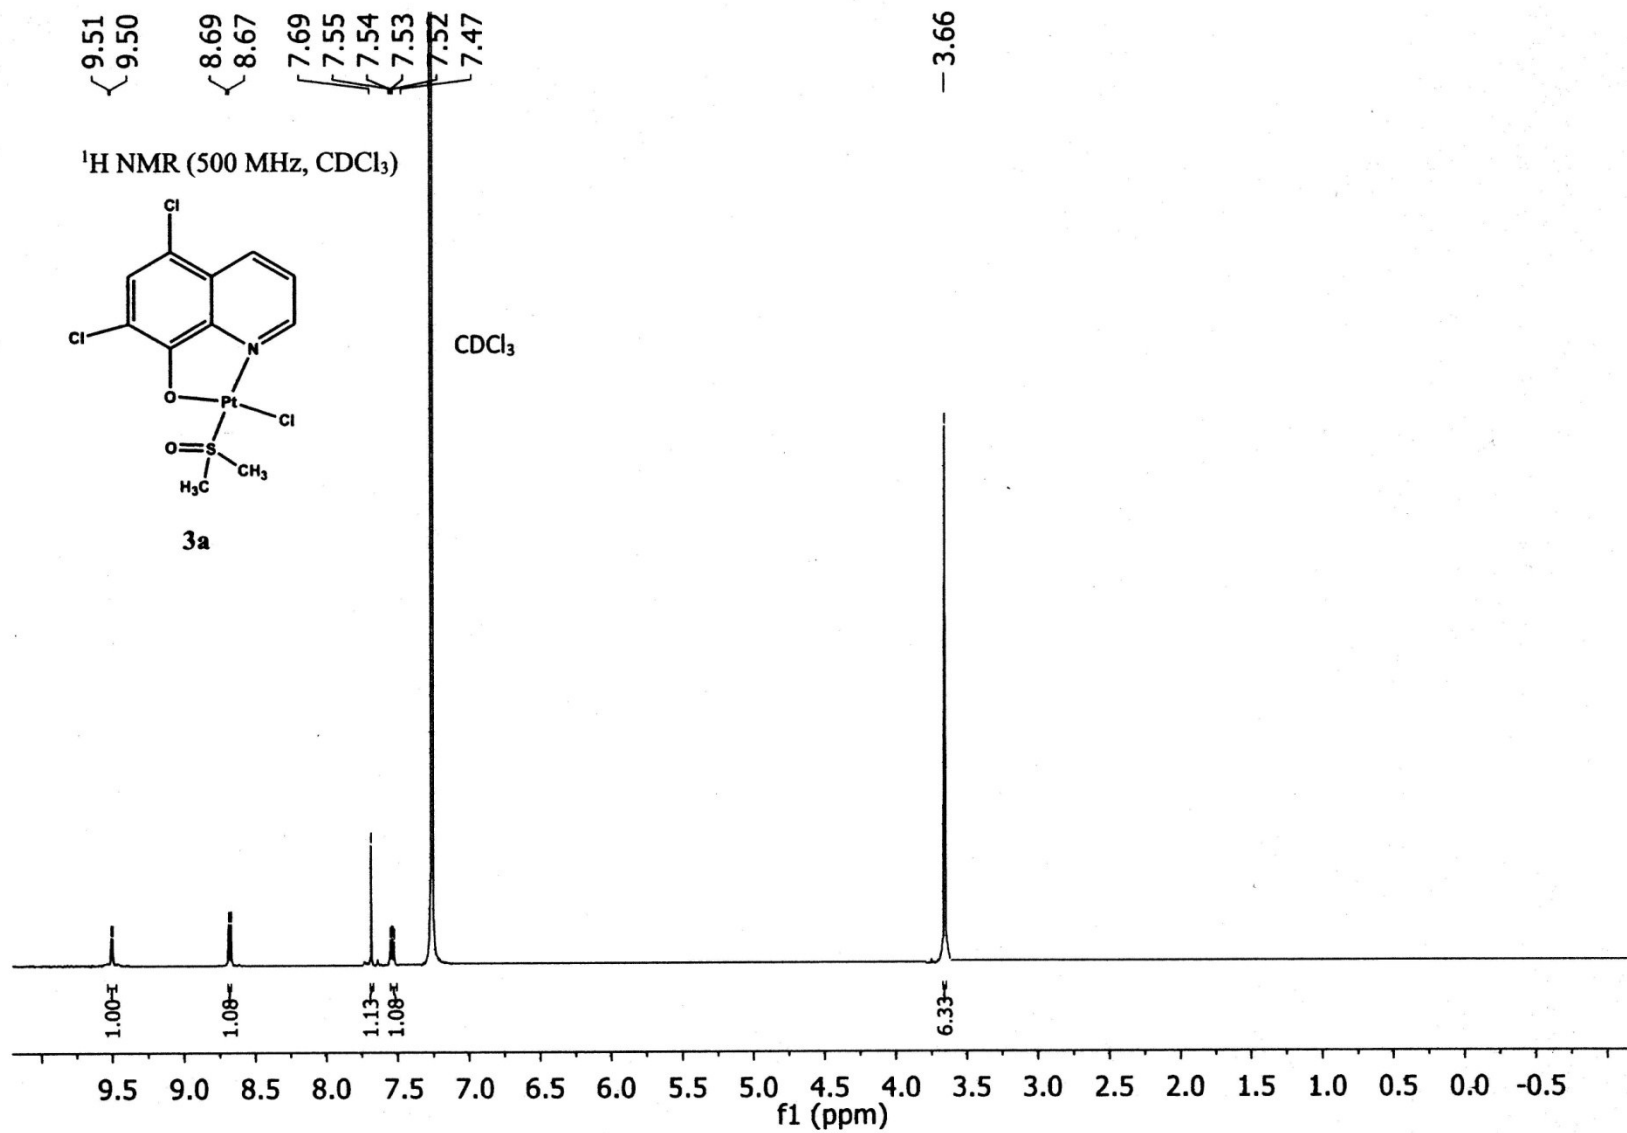

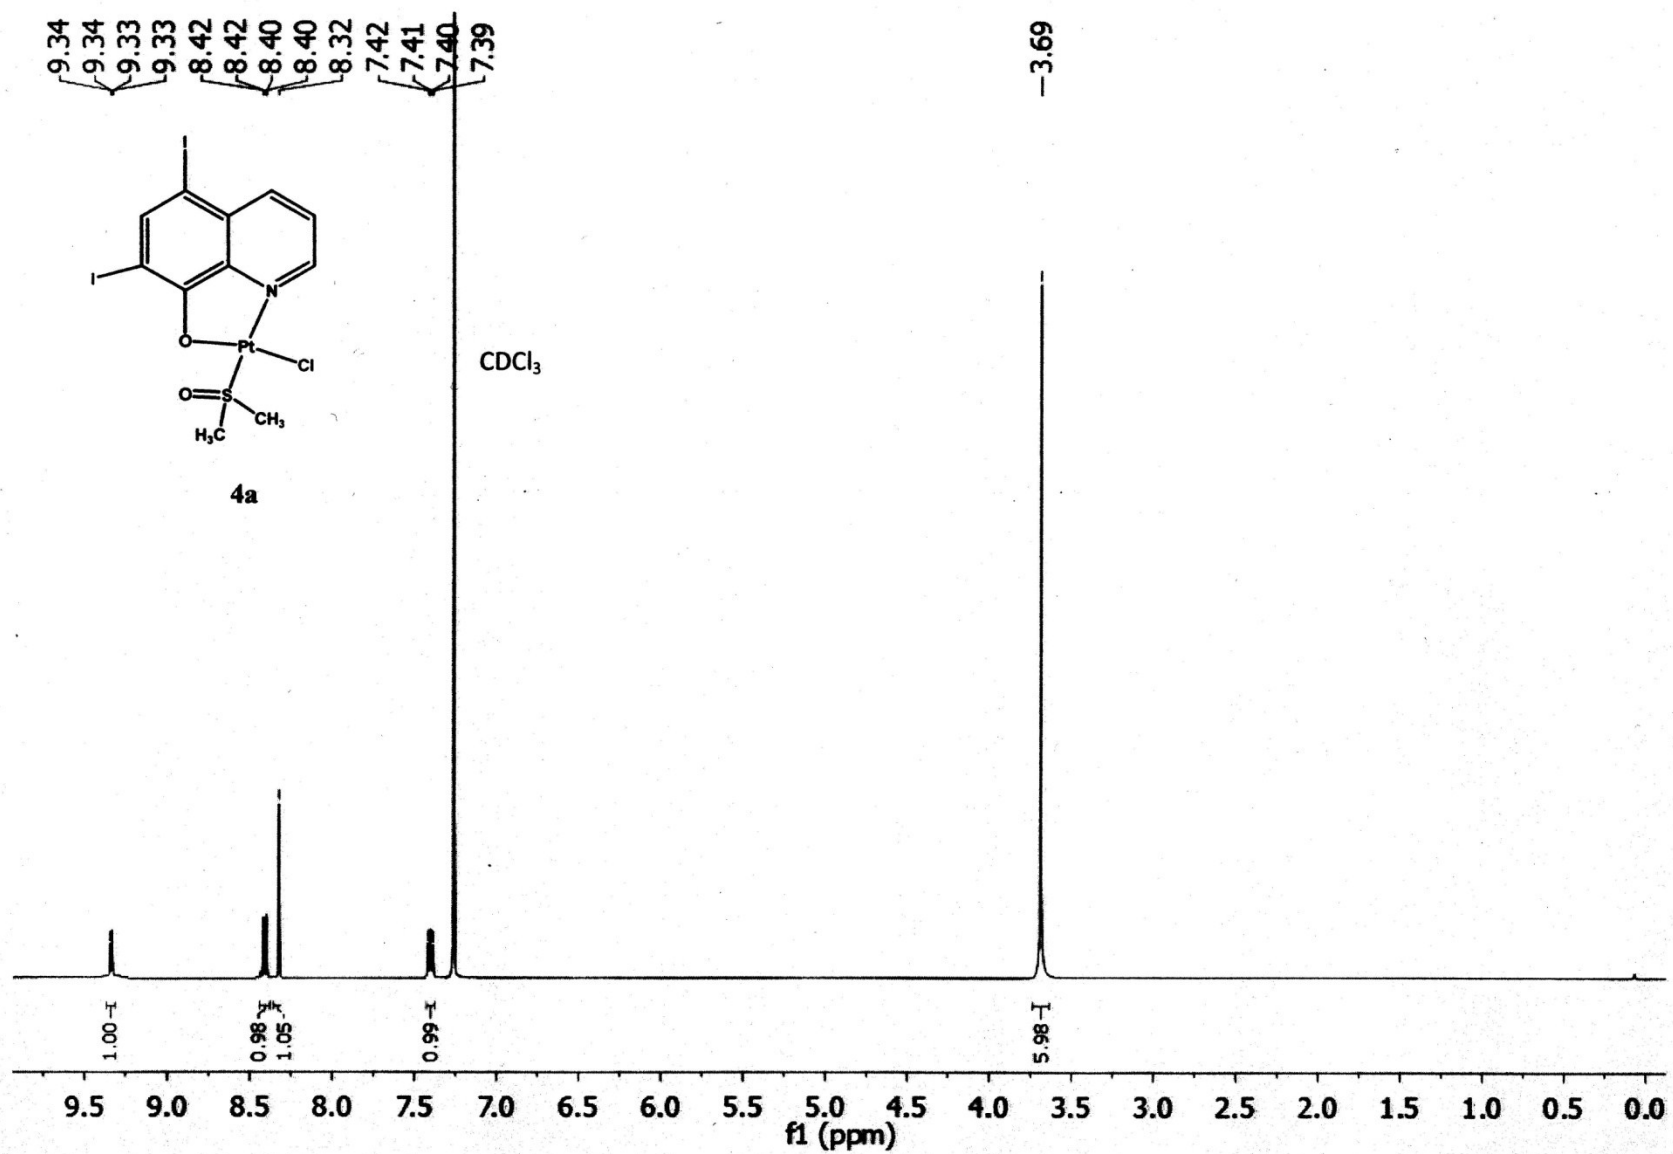

<sup>1</sup>H NMR (500 MHz, CDCl<sub>3</sub>)

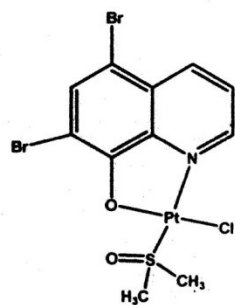

**5a**

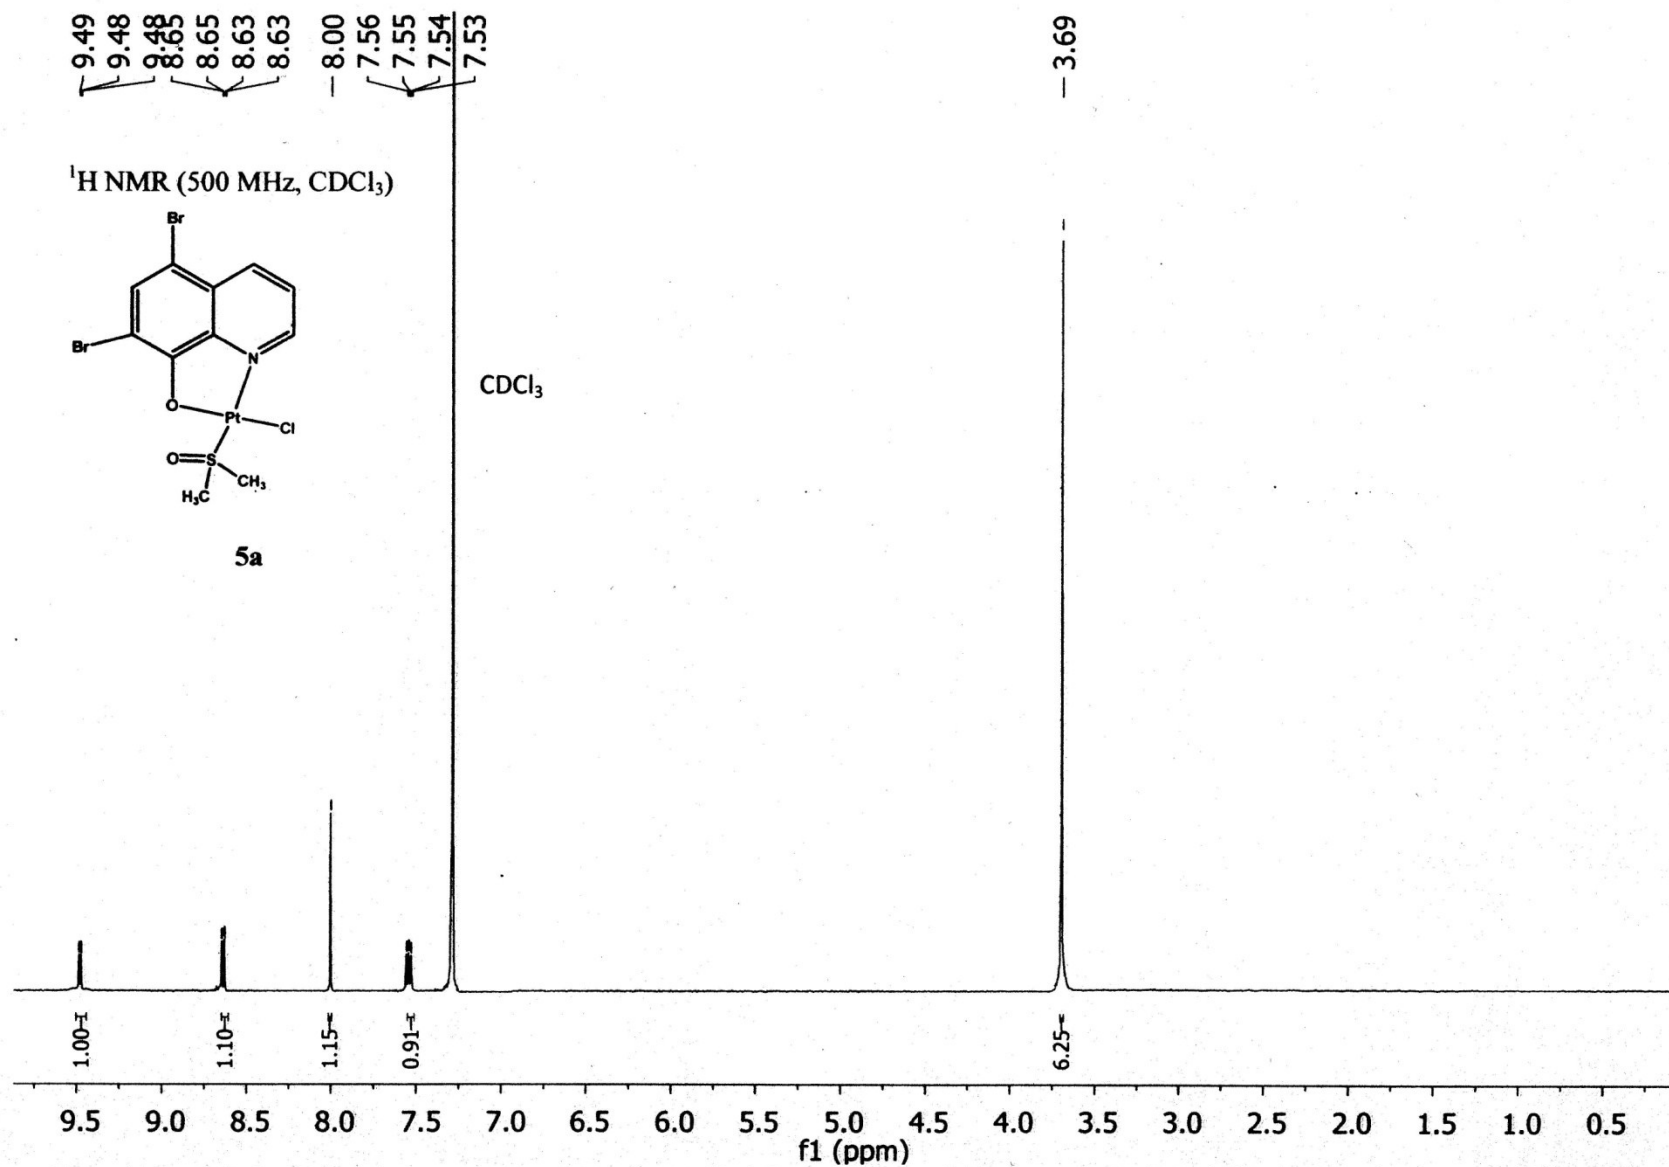

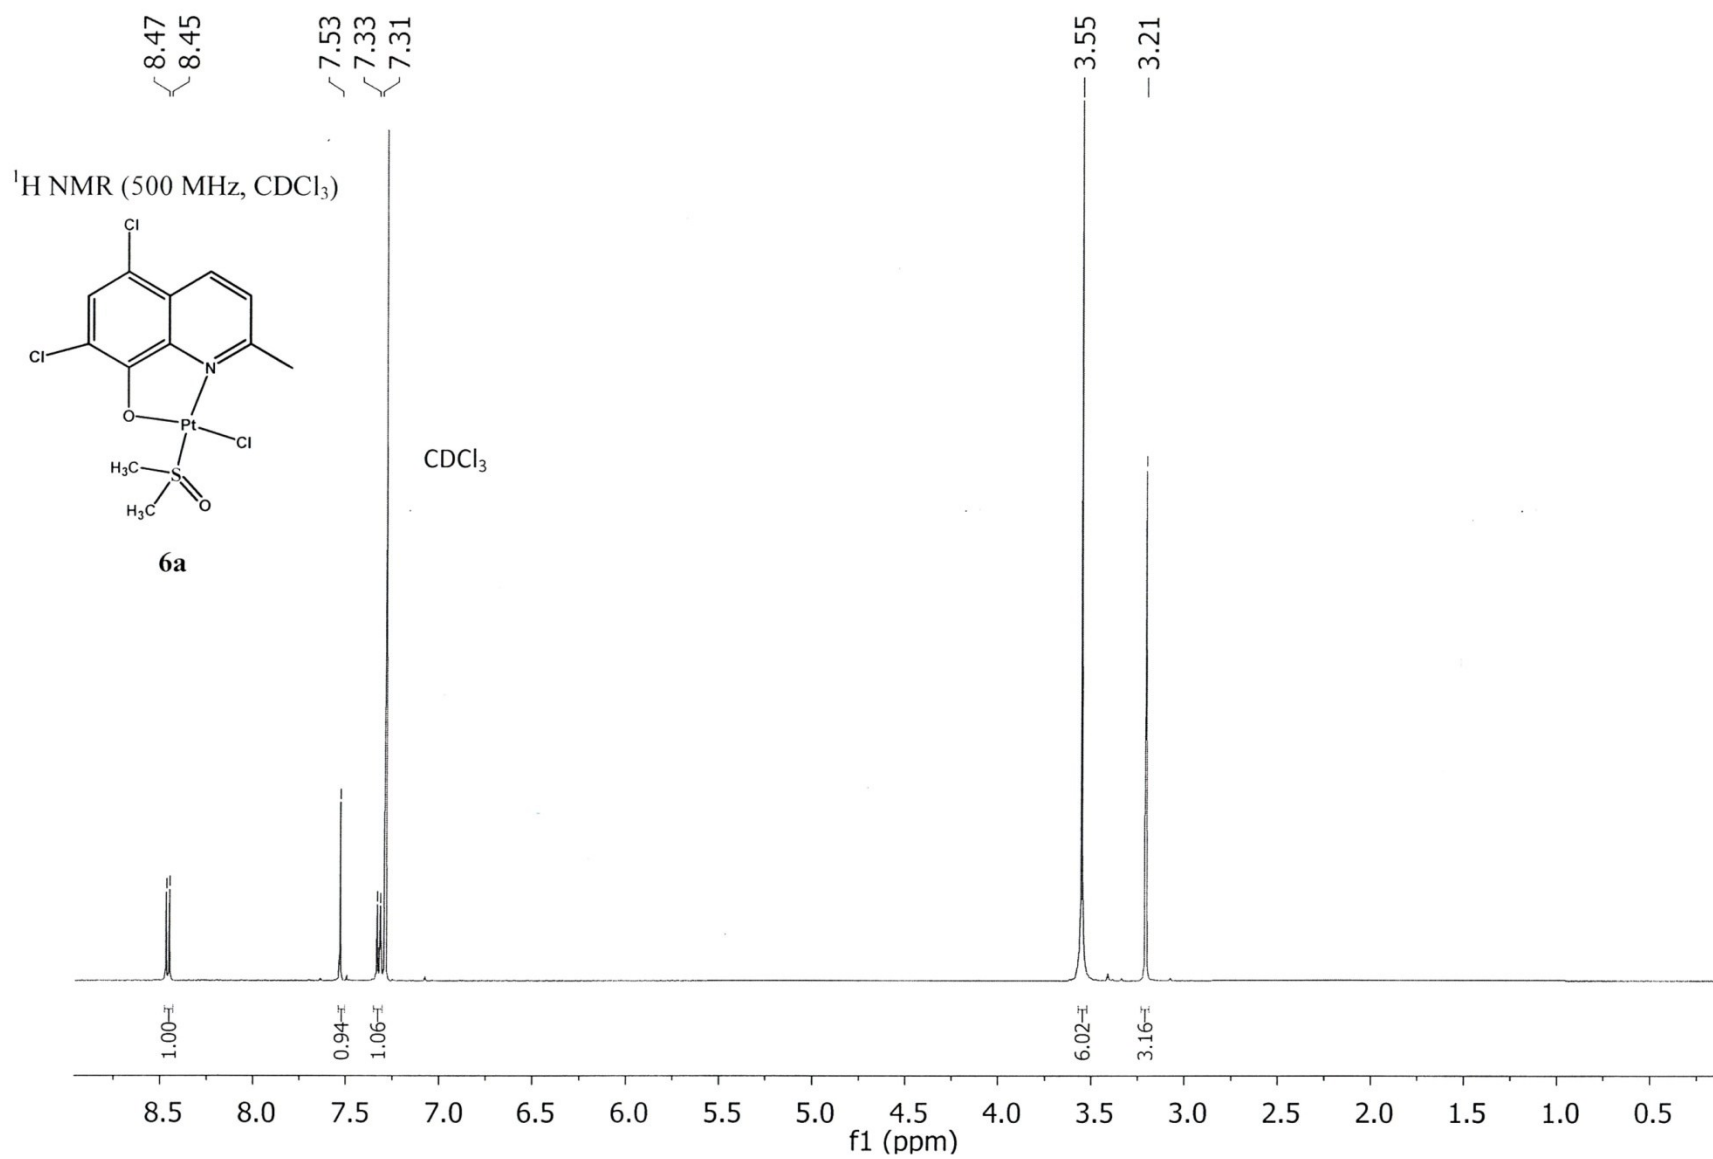



9.41 9.41 9.40 9.40  
 8.36 8.36 8.35 8.35  
 7.52 7.50 7.48 7.44 7.43 7.42 7.41 7.08 7.06

— 3.64

$^1\text{H}$  NMR (500 MHz,  $\text{CDCl}_3$ )

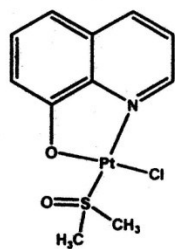

7a

$\text{CDCl}_3$

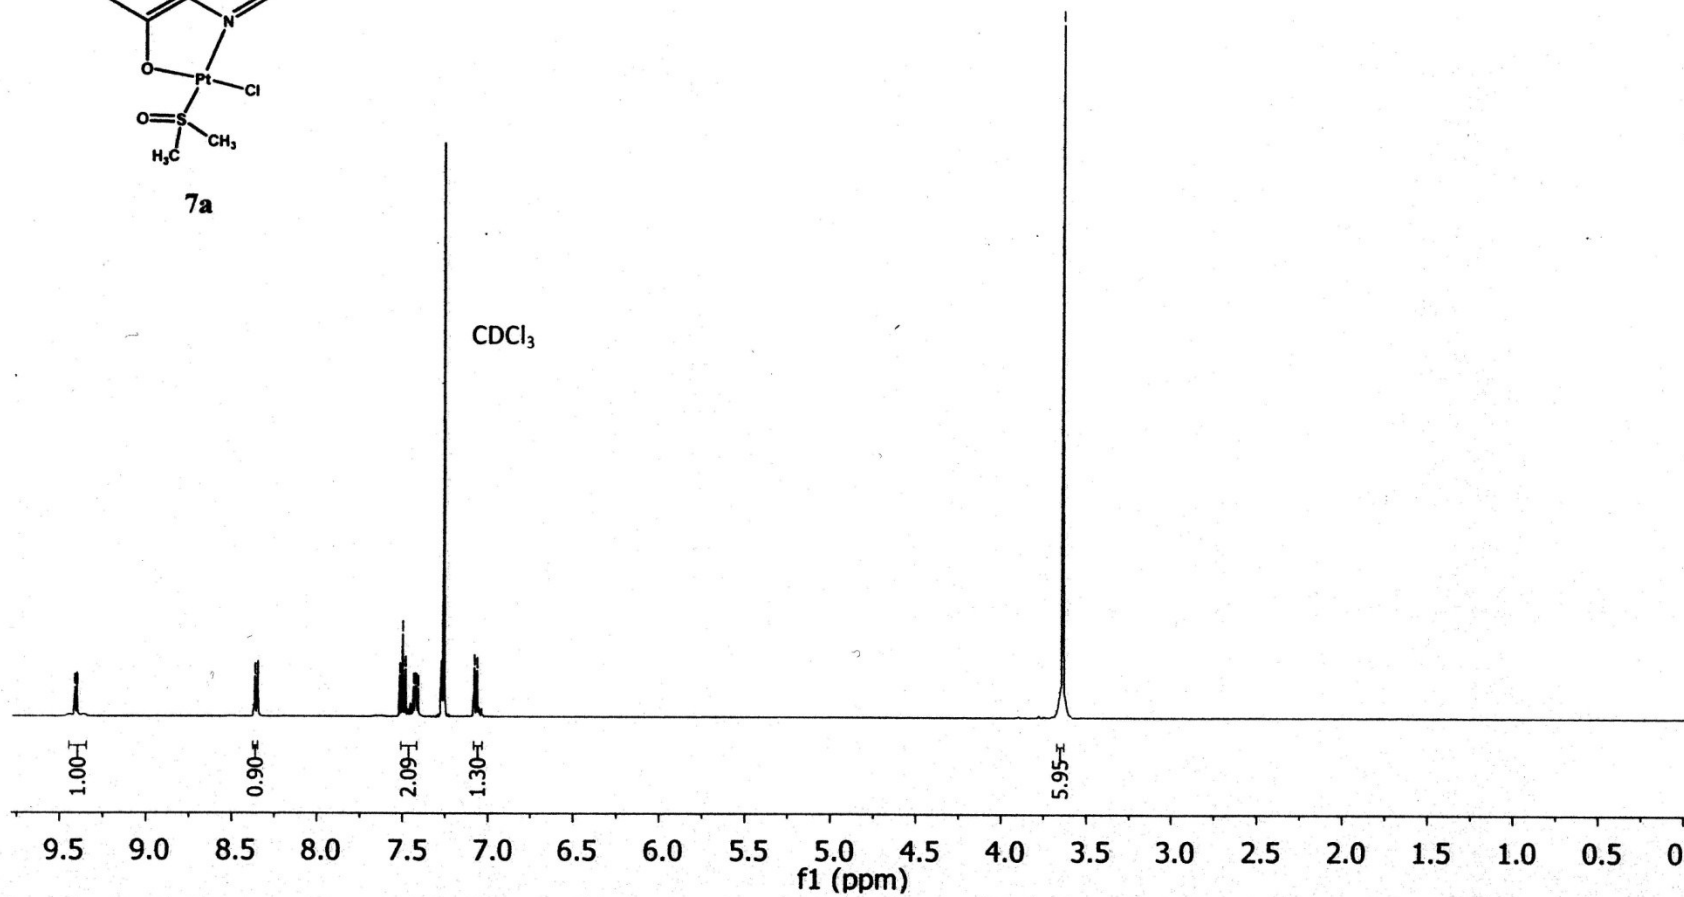

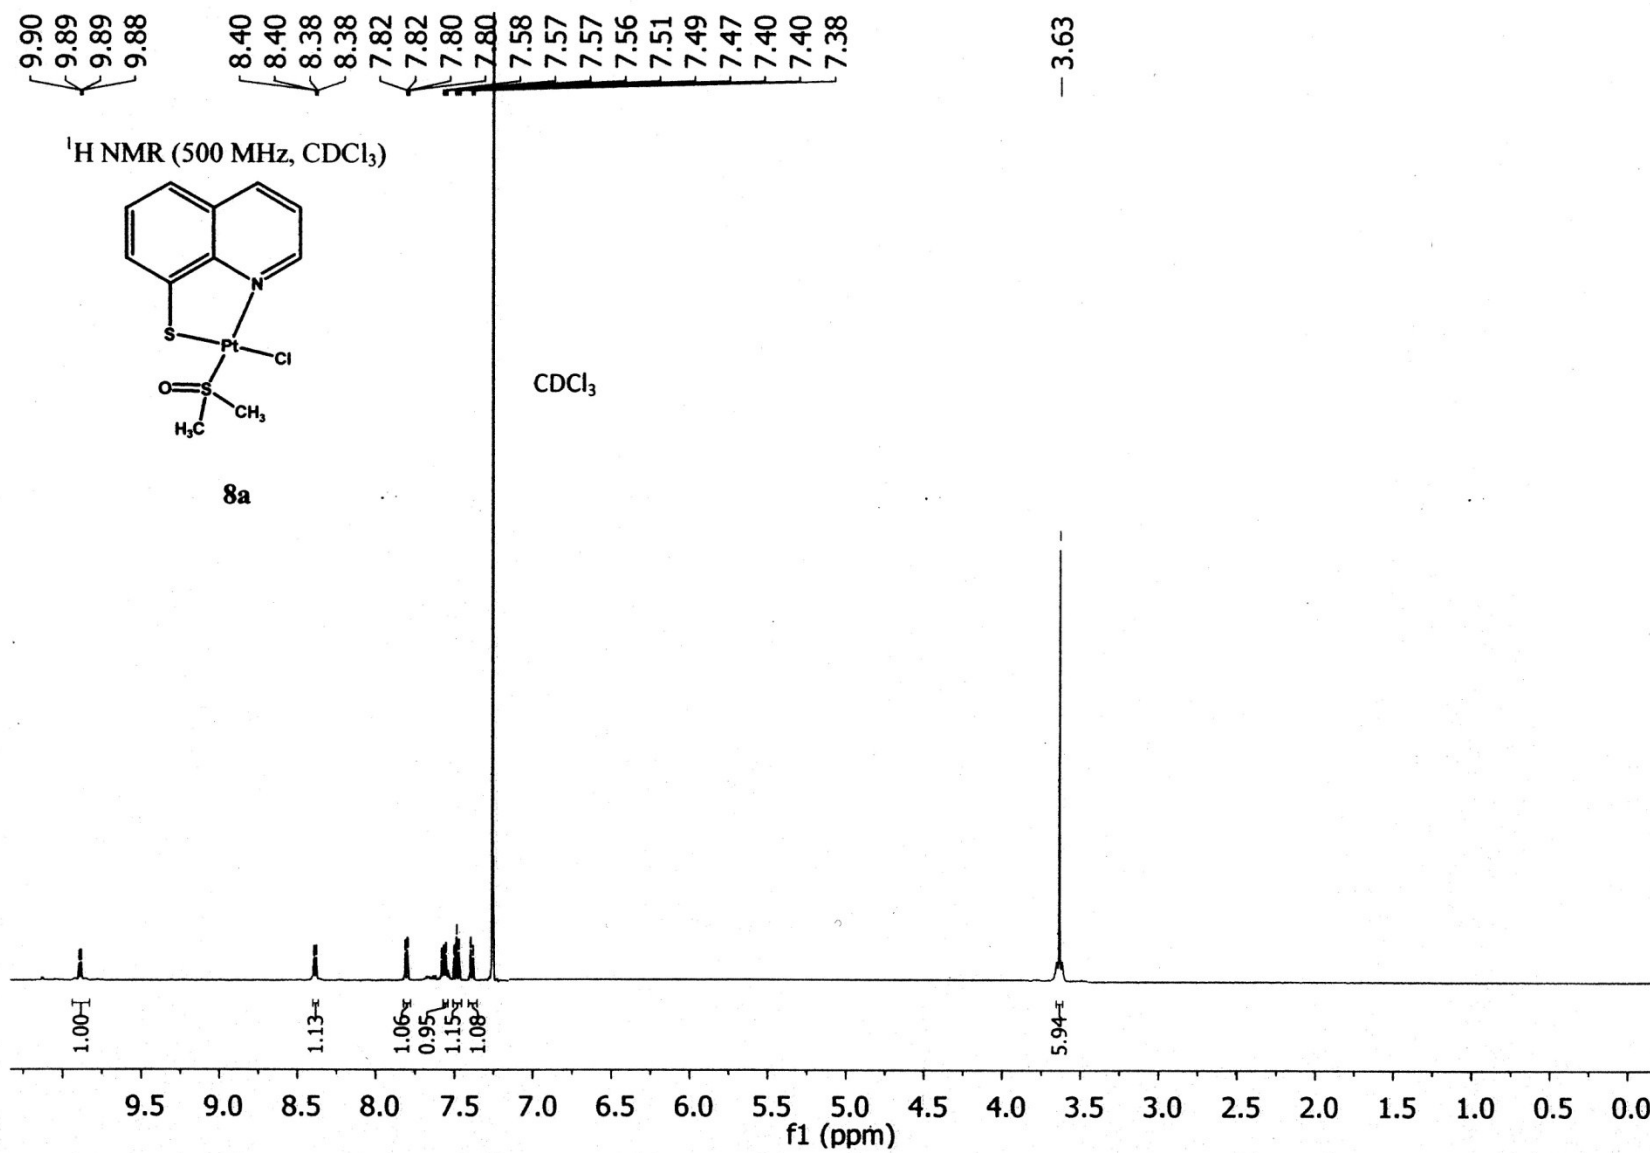

$^1\text{H}$  NMR (500 MHz,  $\text{CDCl}_3$ )

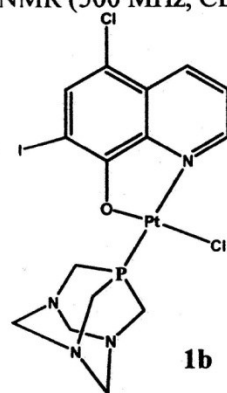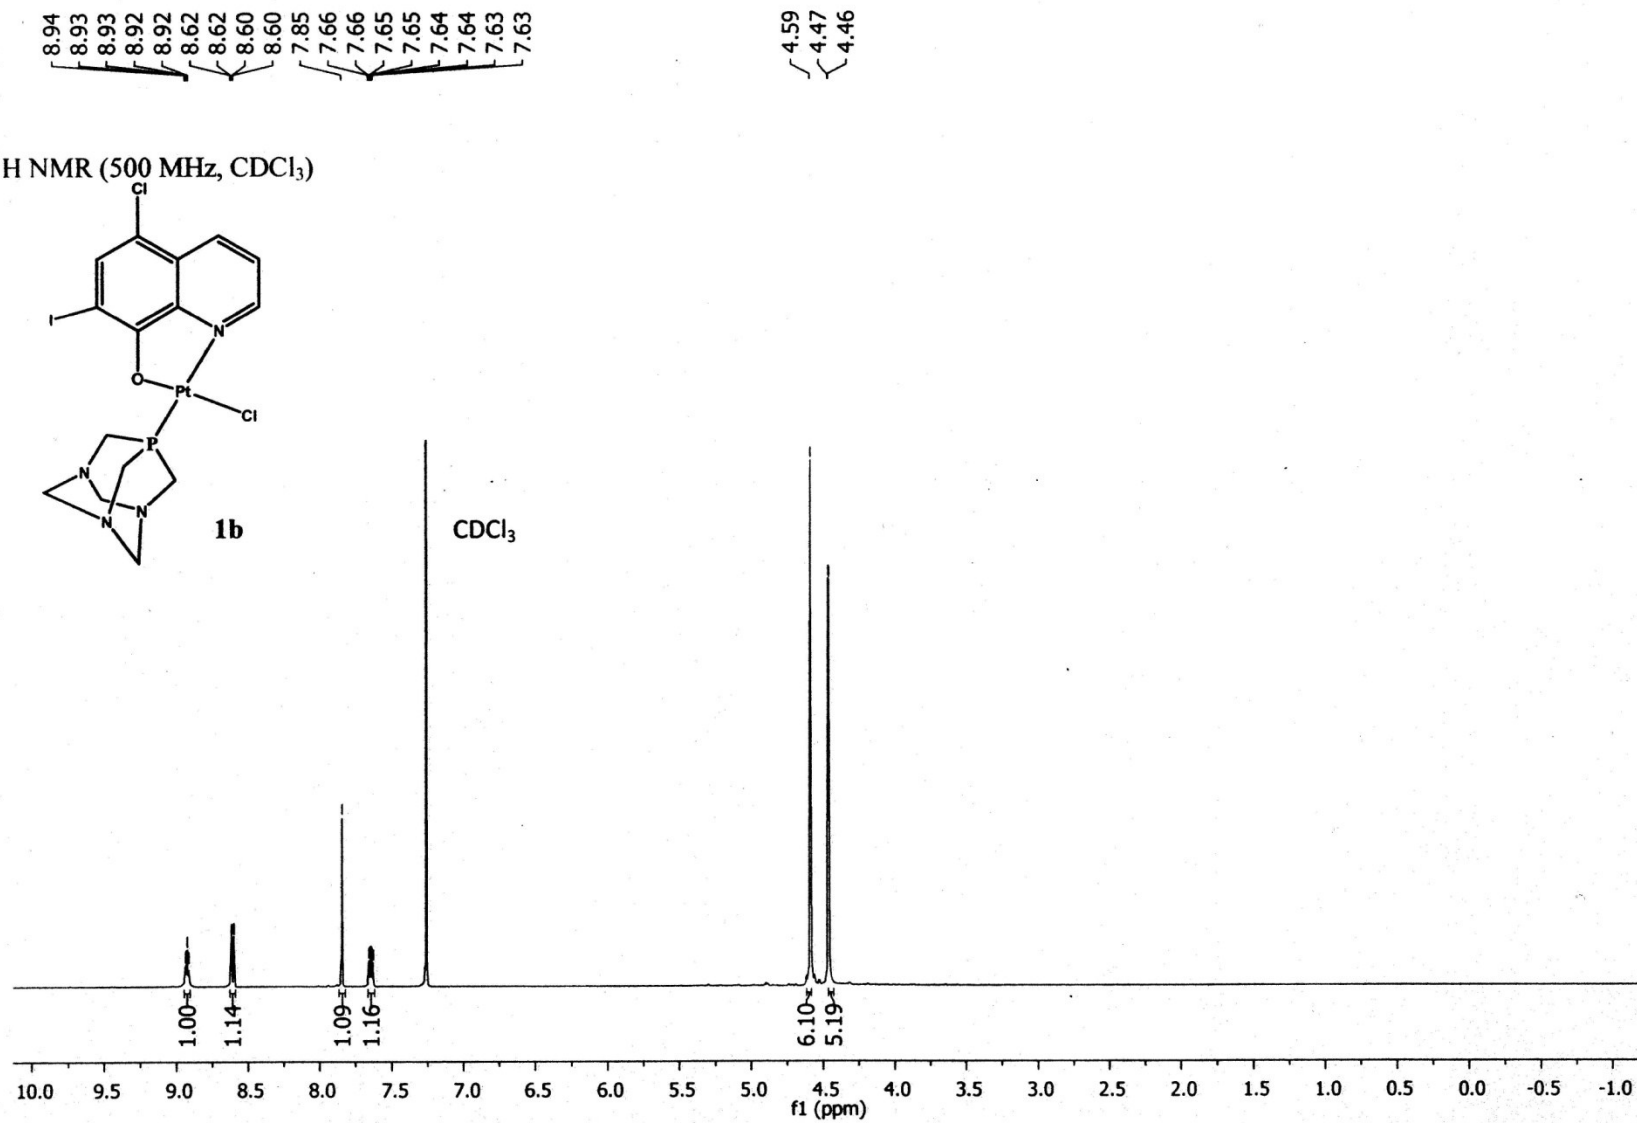

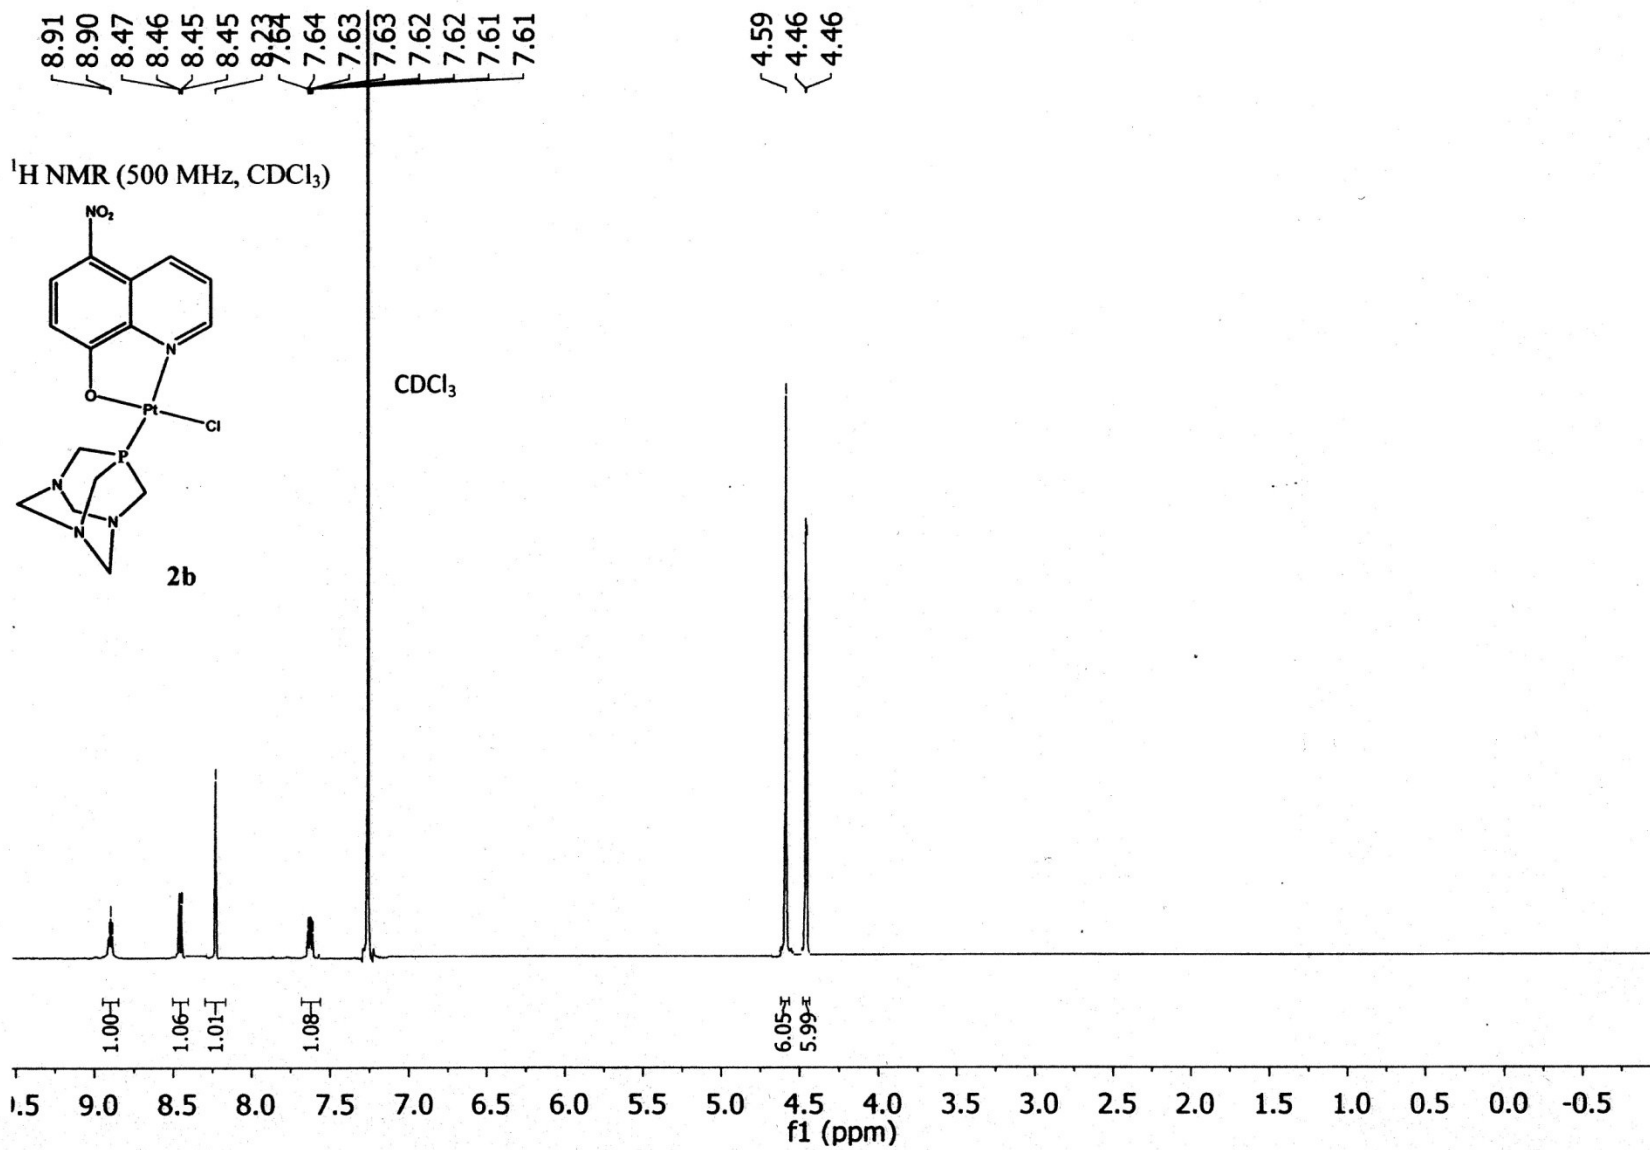

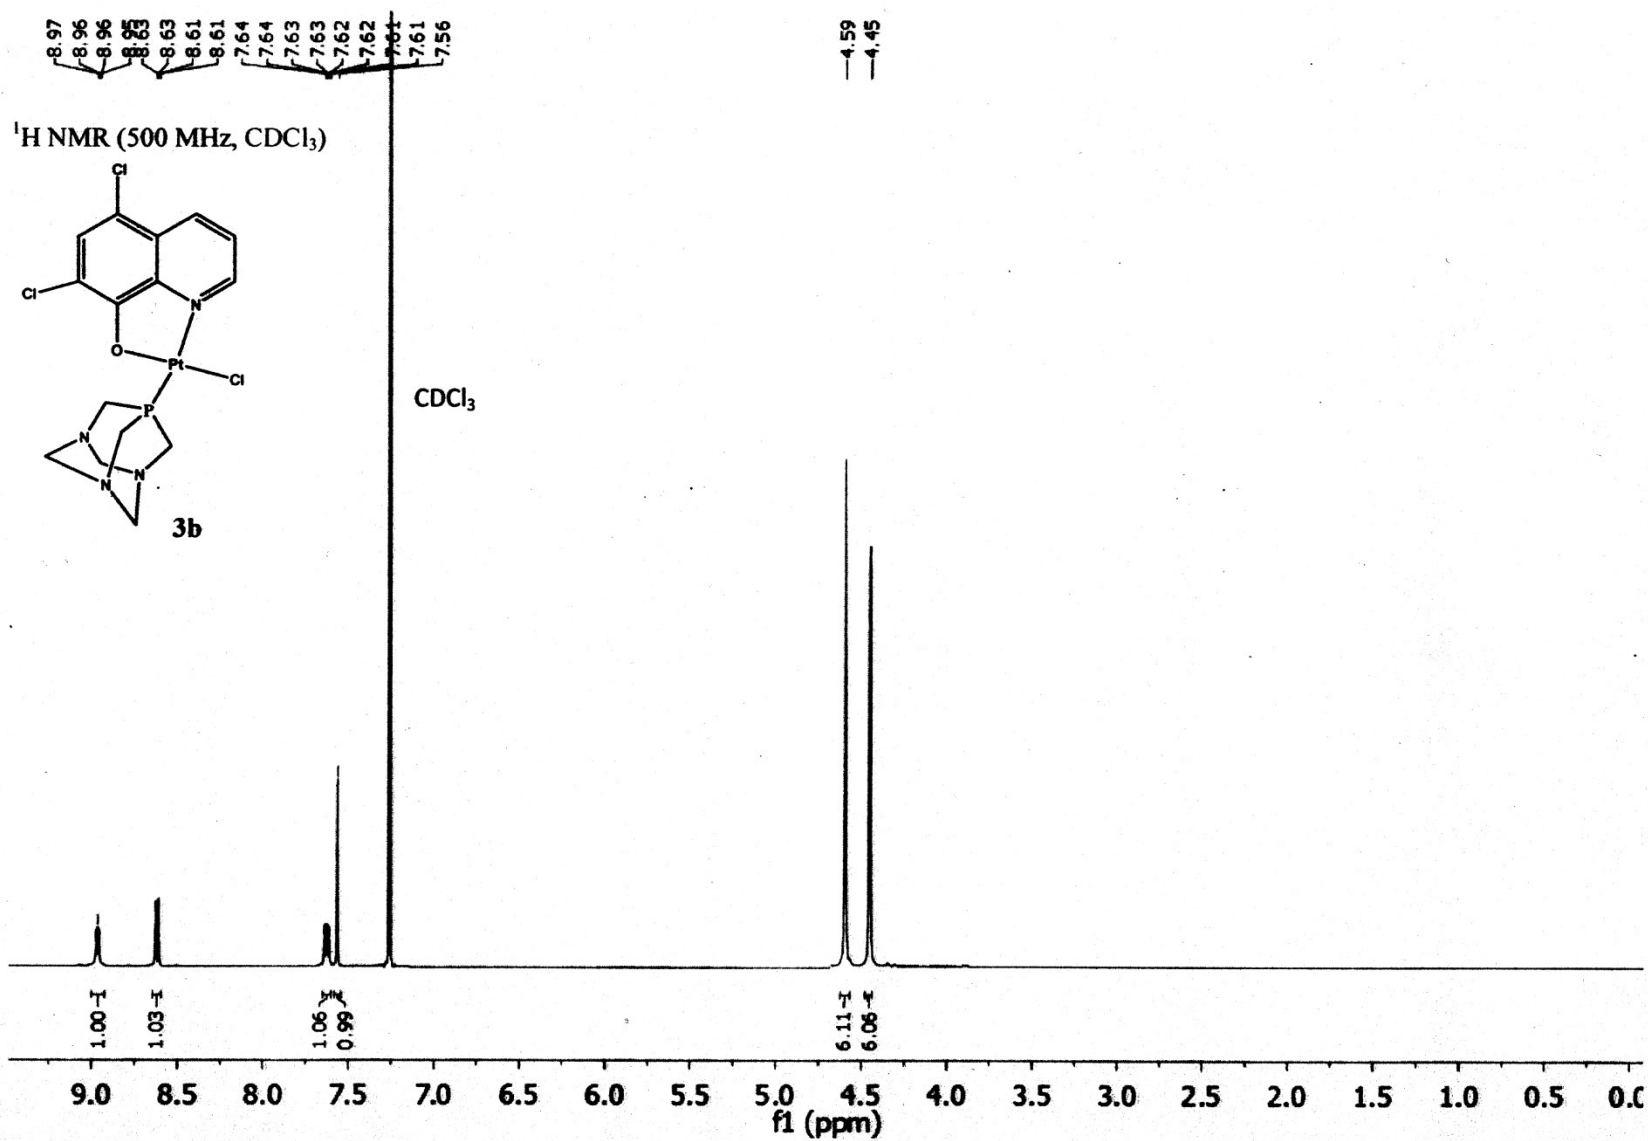

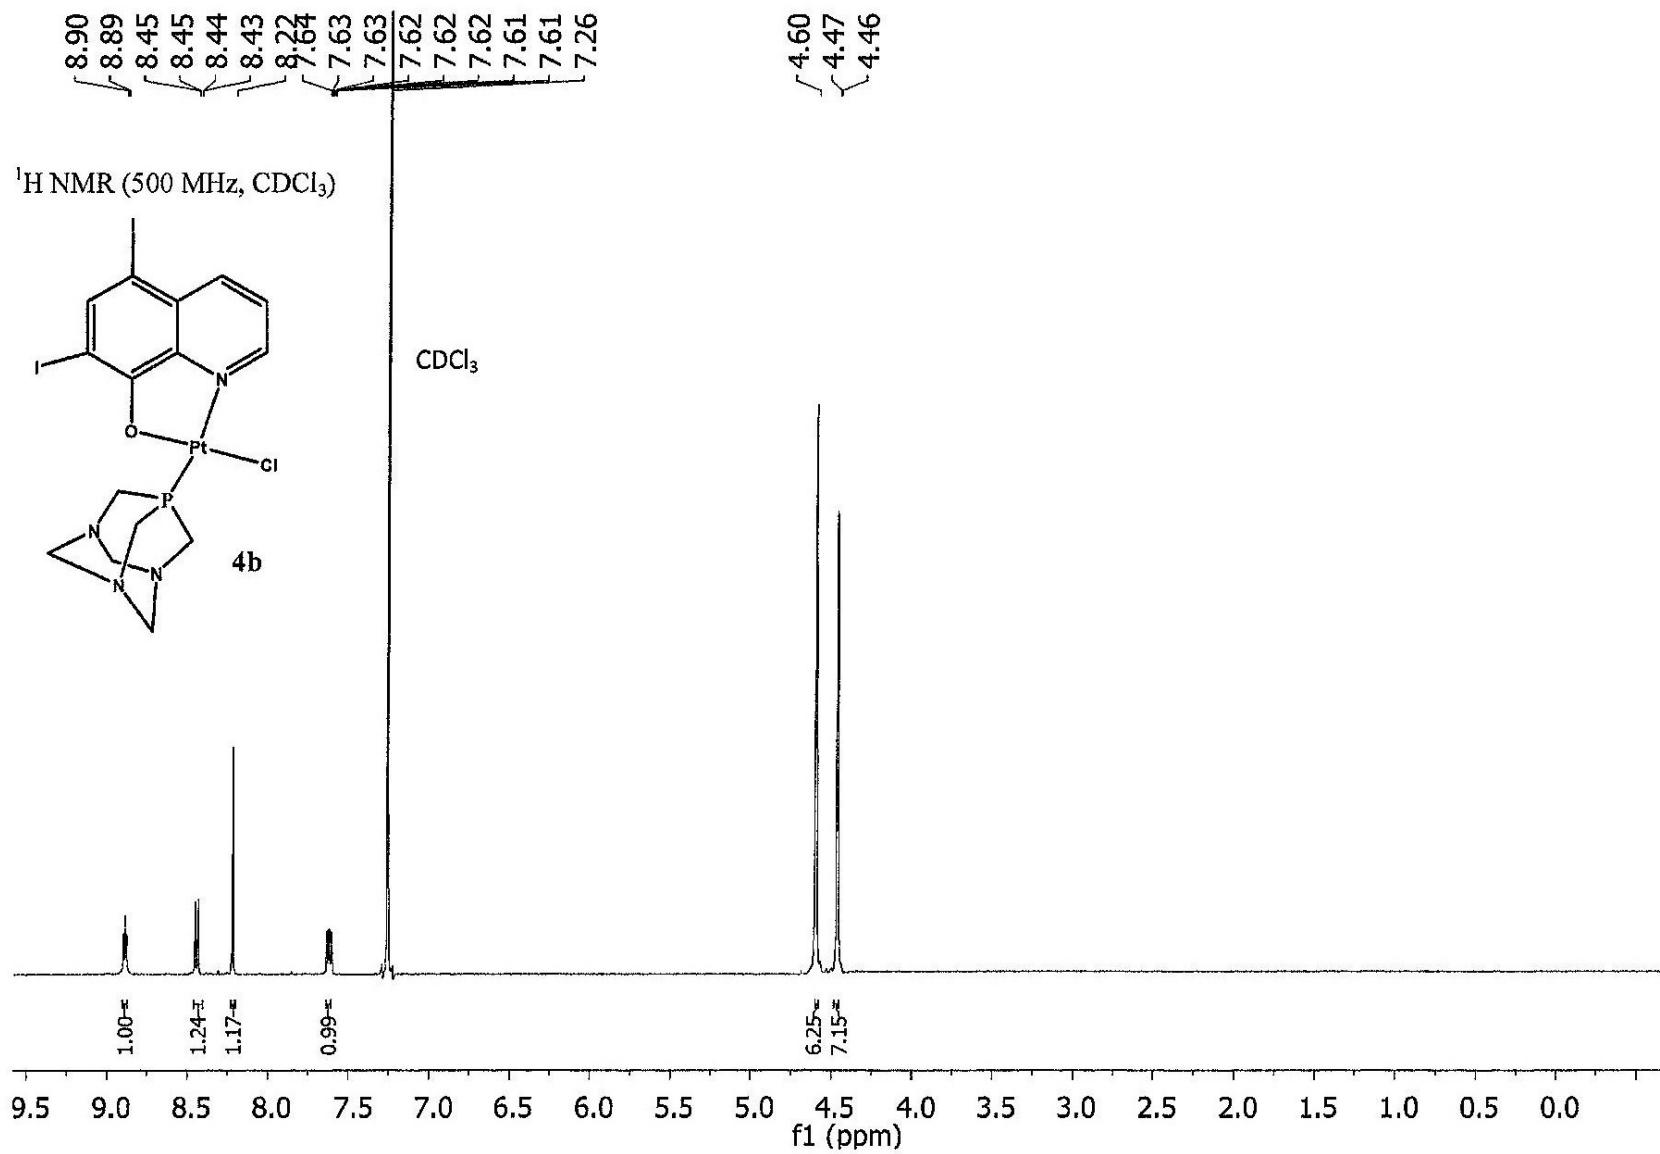

8.92  
8.92  
8.91  
8.91  
8.90  
8.56  
8.54  
7.83  
7.64  
7.63  
7.63  
7.63  
7.62  
7.62  
7.61  
7.61

4.59  
4.46

$^1\text{H}$  NMR (500 MHz,  $\text{CDCl}_3$ )

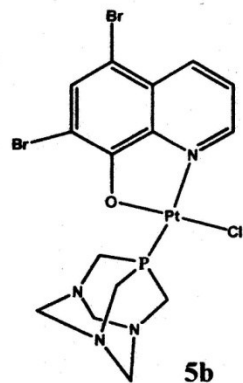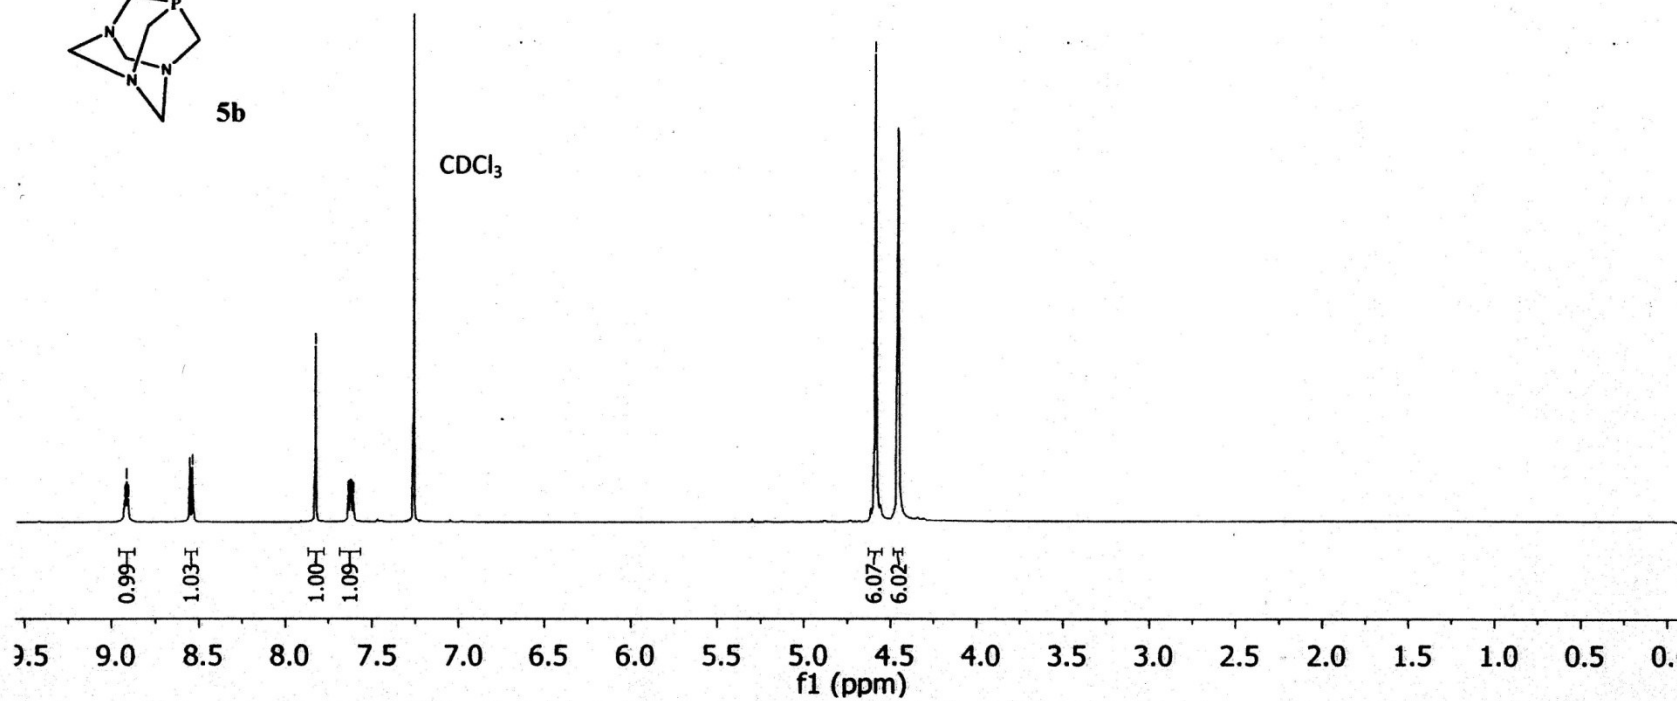

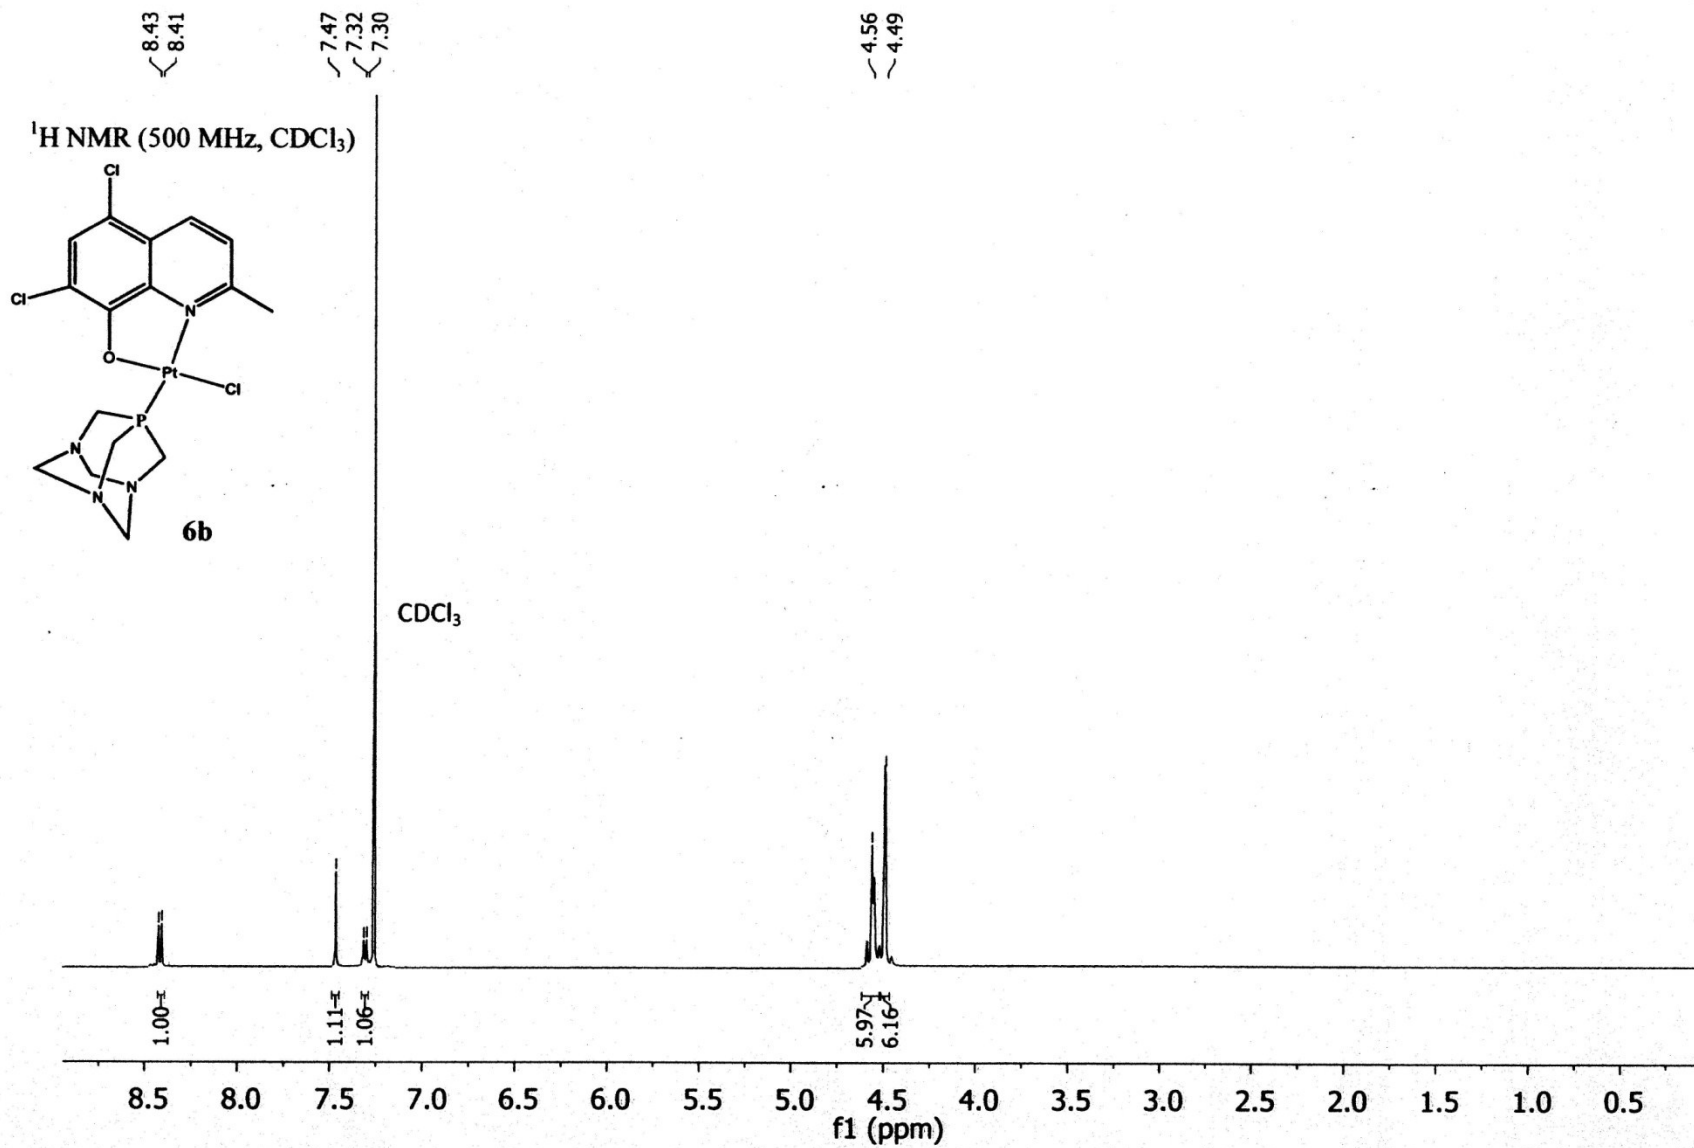



9.41  
9.41  
9.40  
9.40

8.36  
8.36  
8.35  
8.35

7.52  
7.50  
7.48  
7.44  
7.43  
7.06

4.589  
4.459

$^1\text{H}$  NMR (500 MHz,  $\text{CDCl}_3$ )

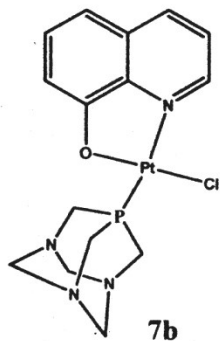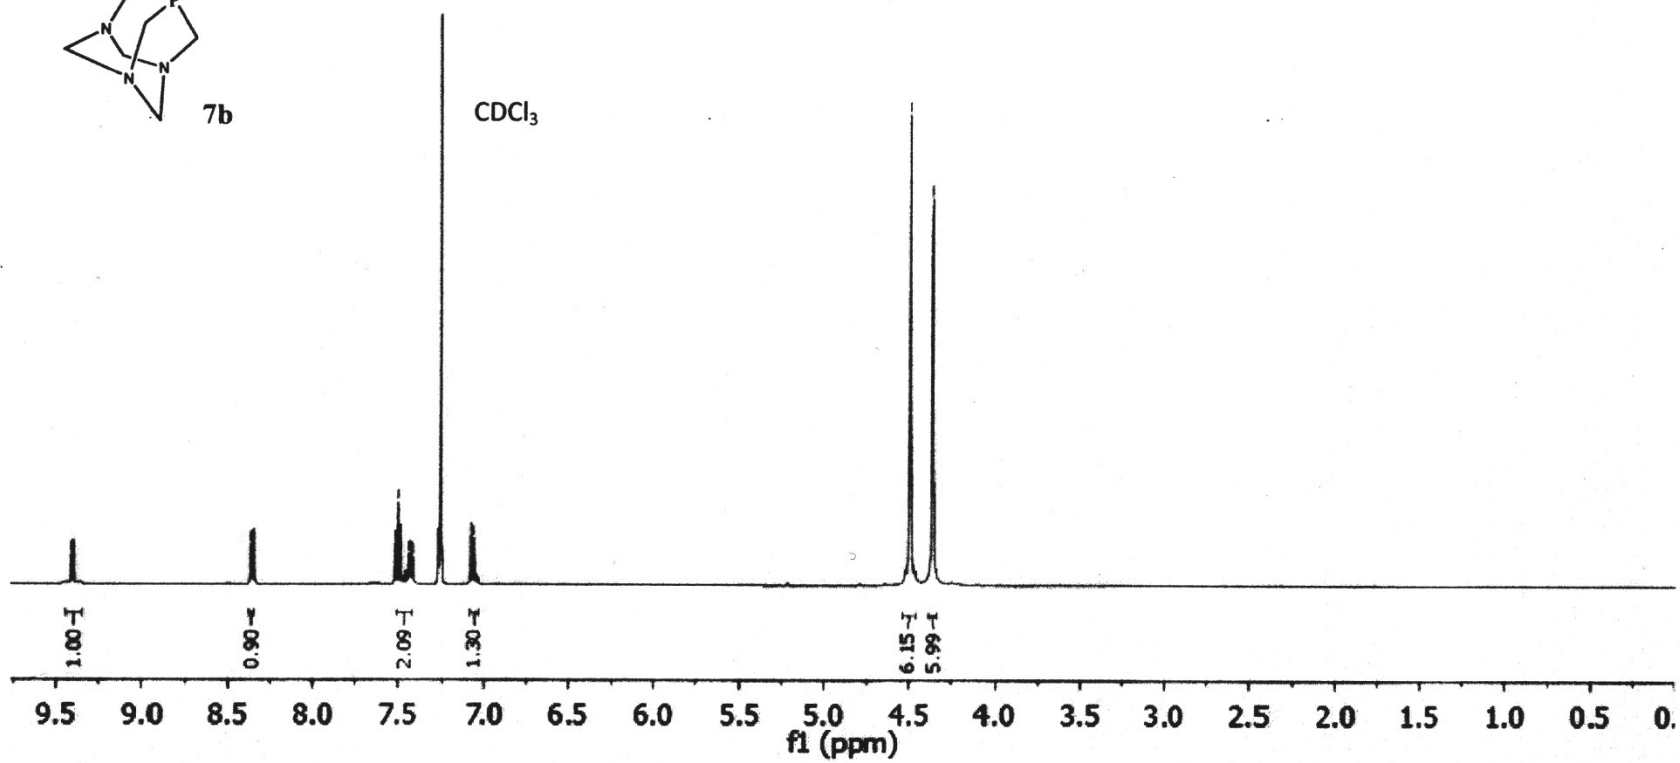

9.83 9.83 9.82 9.81 9.81  
 8.38 8.38 8.36 8.36  
 7.82 7.81 7.62 7.62 7.61 7.60 7.59 7.47 7.45 7.44 7.40 7.38 7.26  
 ~4.55 ~4.42

$^1\text{H}$  NMR (500 MHz,  $\text{CDCl}_3$ )

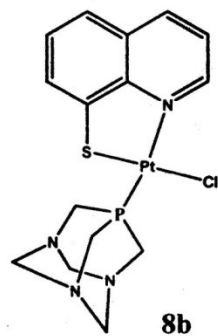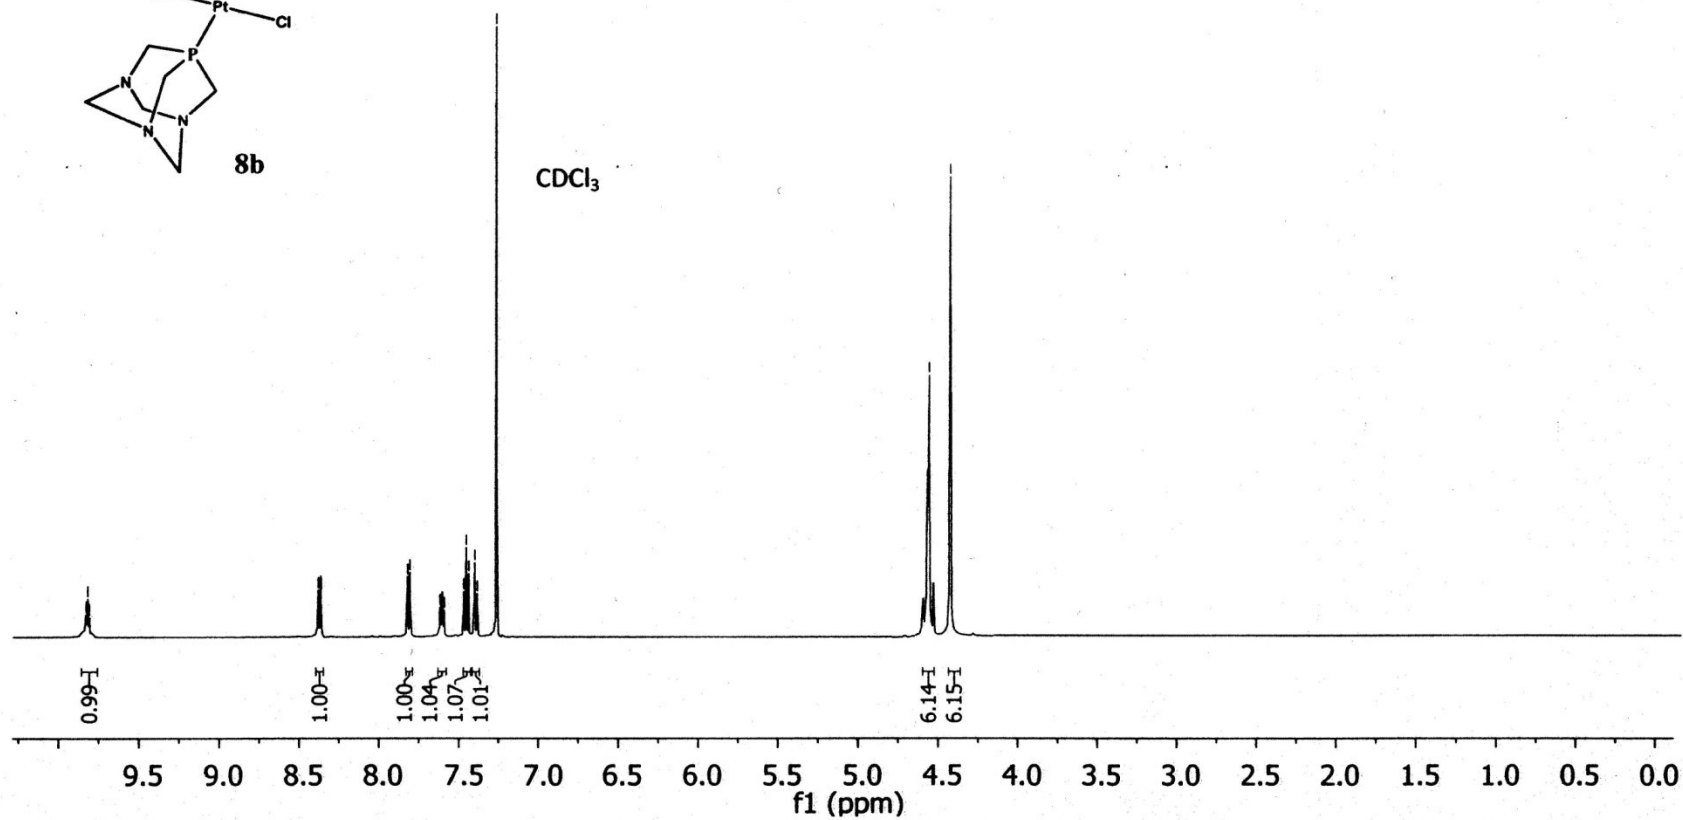

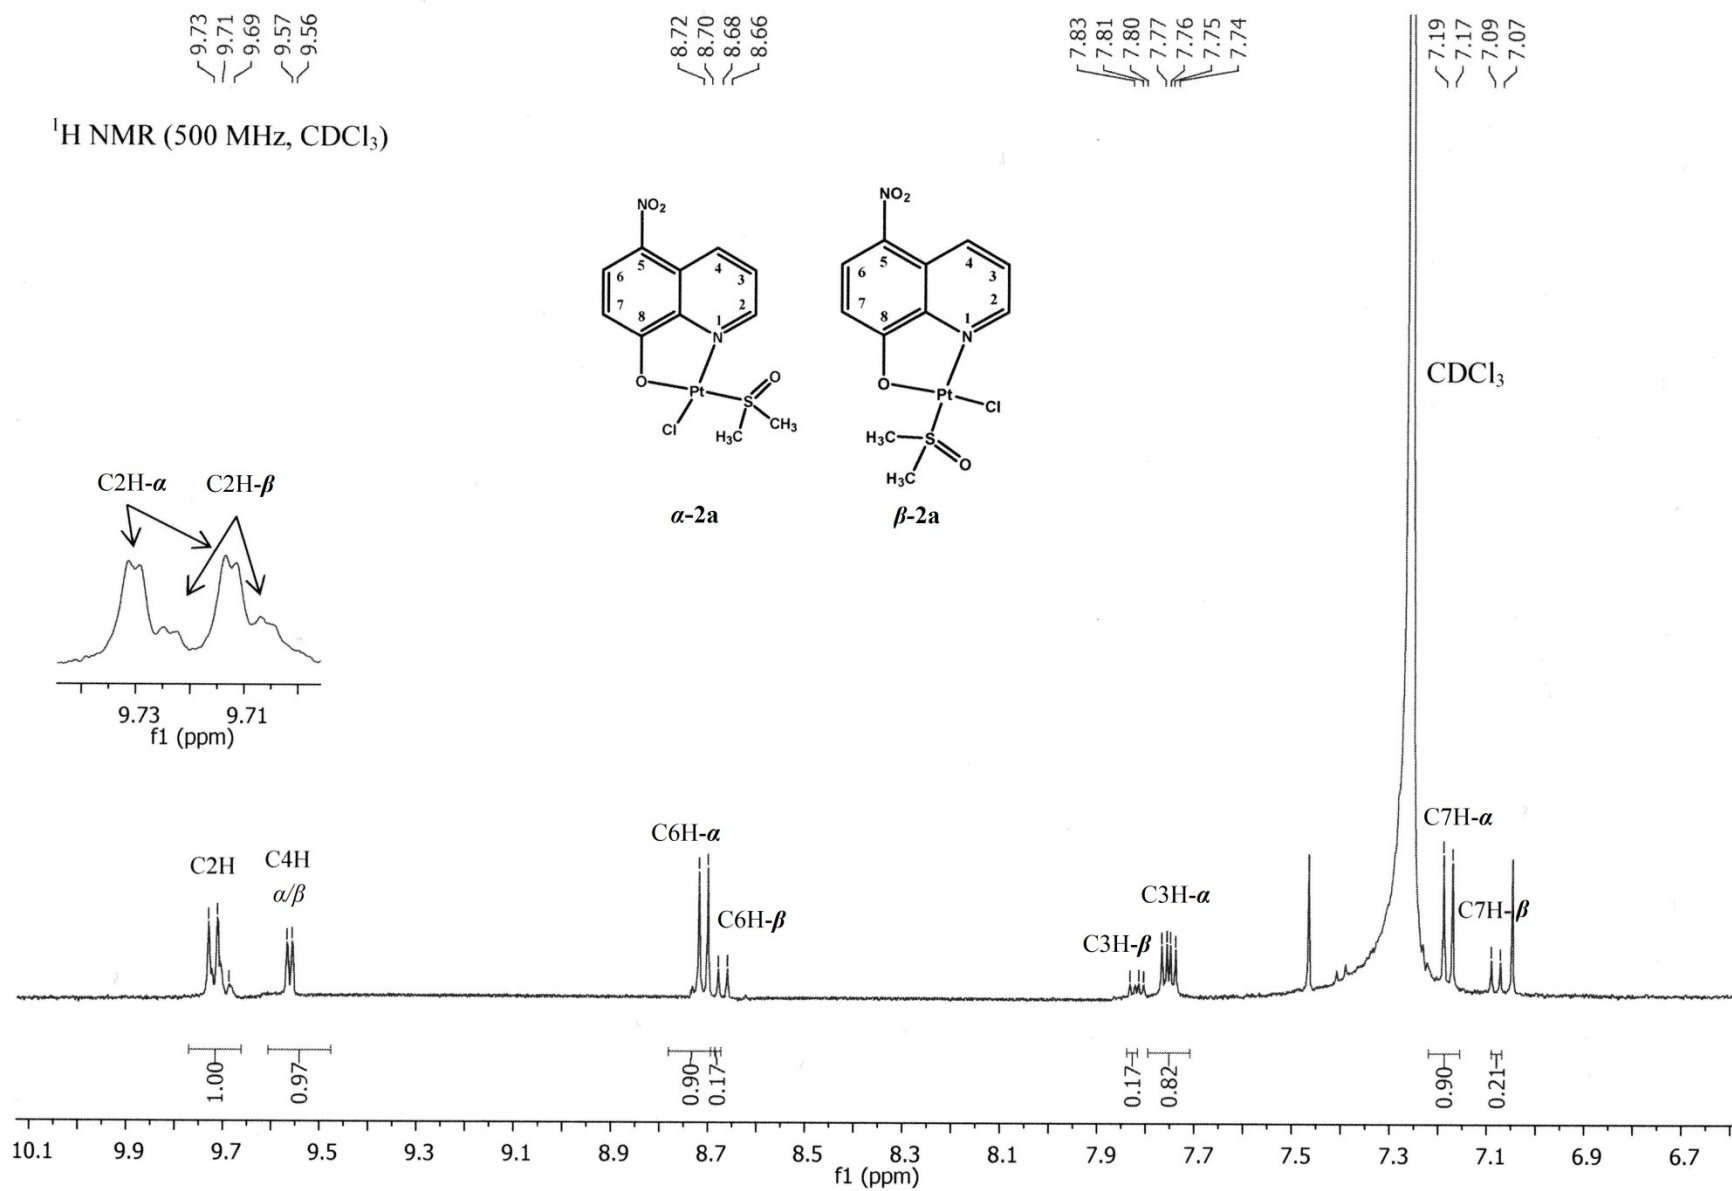

**Figure S1.** A mixture of  $\alpha$  and  $\beta$  isomer of complex **2a** evidenced in the <sup>1</sup>H NMR spectrum.

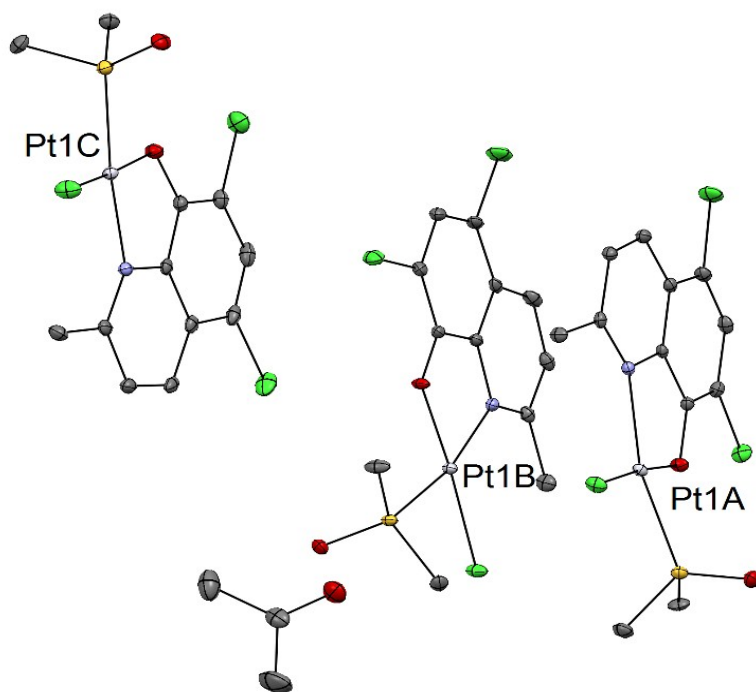

**Figure S2.** Three crystallographically independent molecules of complex **6a**. Thermal ellipsoids are shown at 30% probability level and hydrogen atoms are omitted for better clarity of presentation.

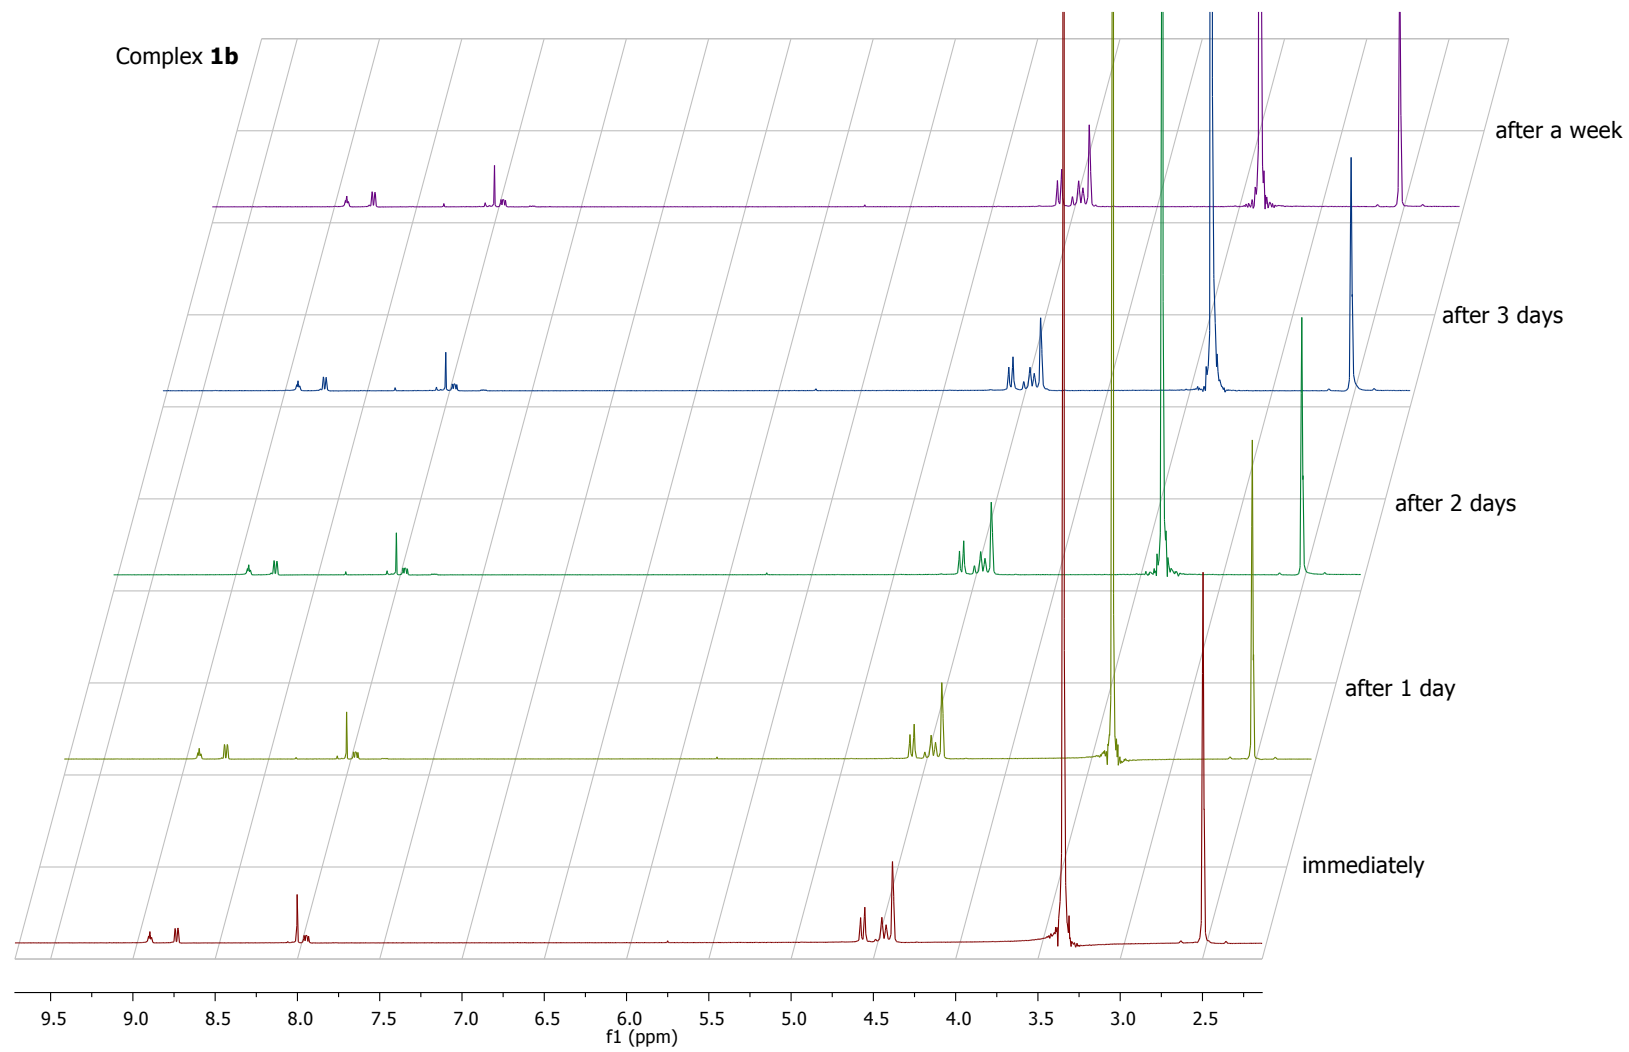

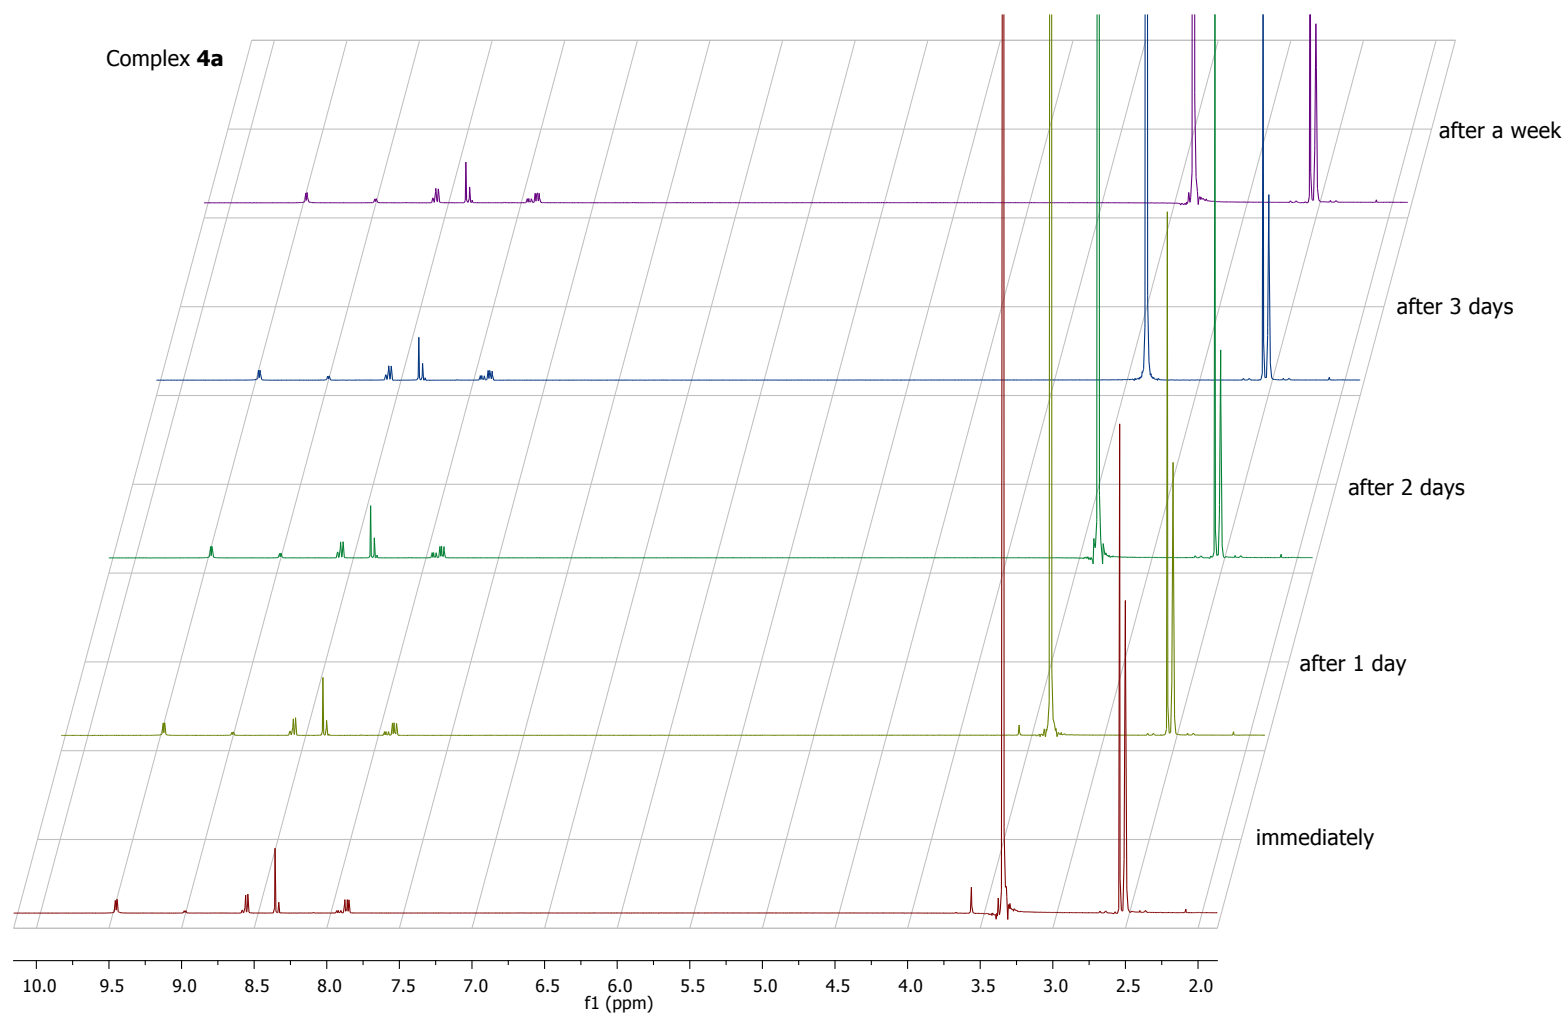

**Figure S3.** Stability of complexes **1b** and **4a** in dmso solution over a period of 7 days followed by  $^1\text{H}$  NMR spectroscopy. Spectra were taken 1) immediately, 2) after 1 day, 3) after 2 days, 4) after 3 days and d) after a week indicating that no degradation of complexes was observed.



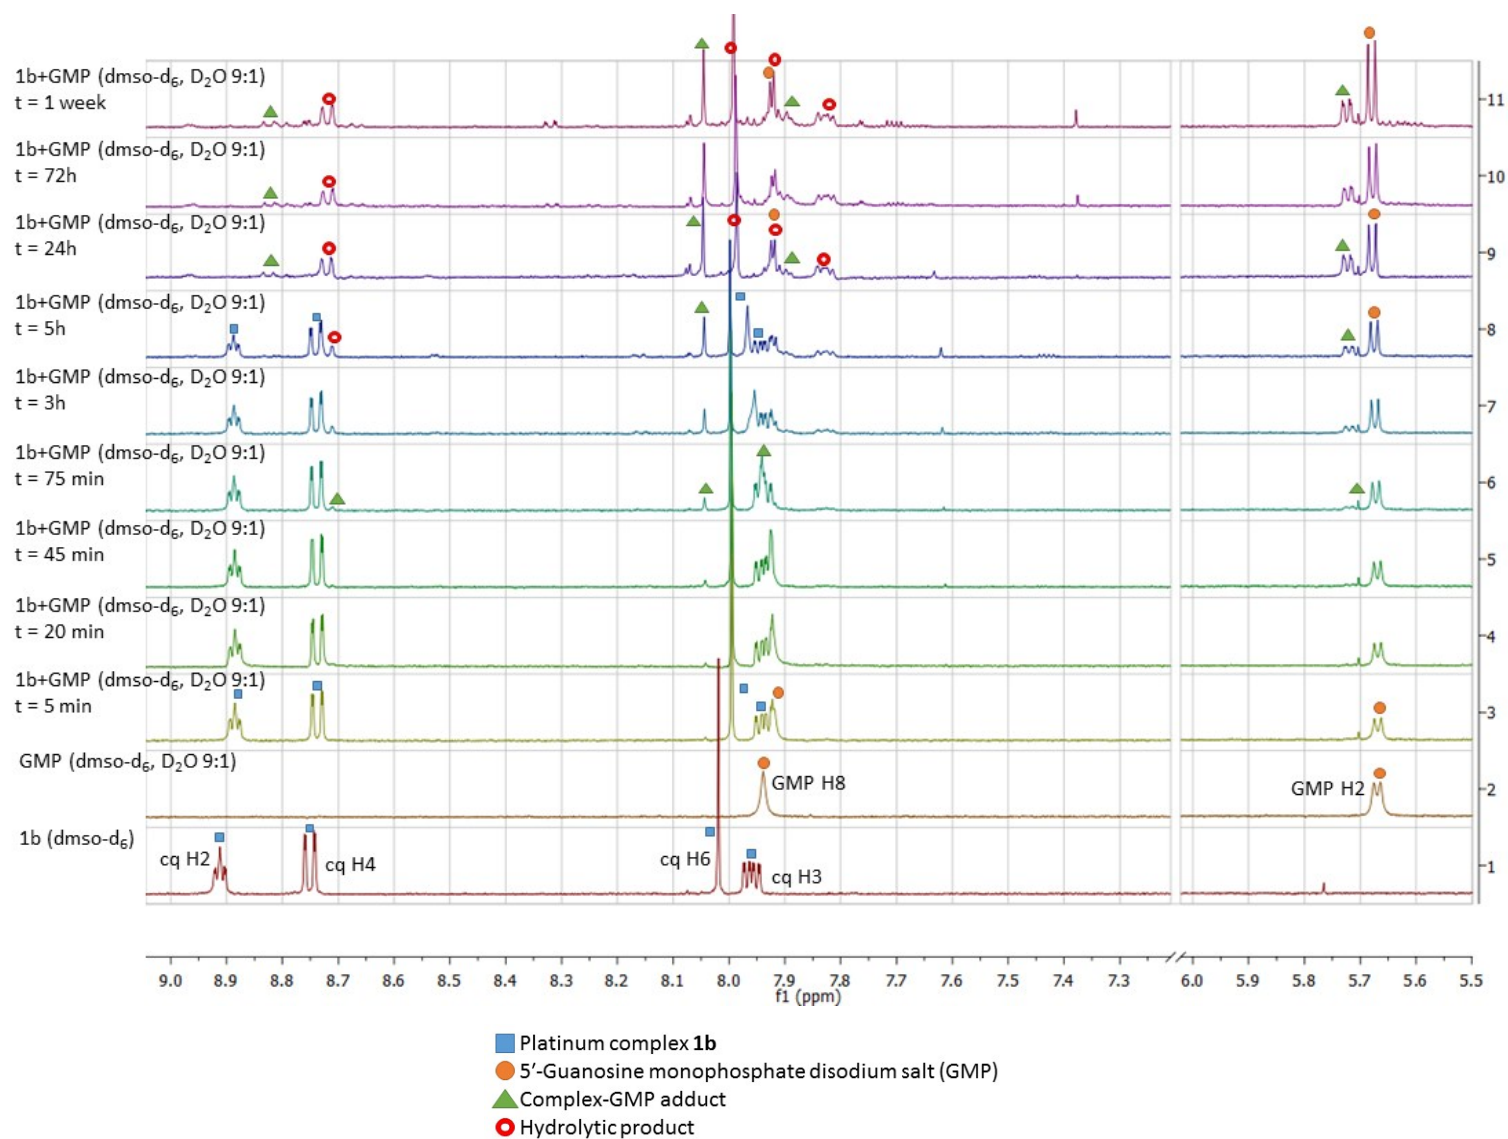

**Figure S5:** Reactivity of complex **1b** towards GMP in dmsO-d<sub>6</sub>/D<sub>2</sub>O 9:1.



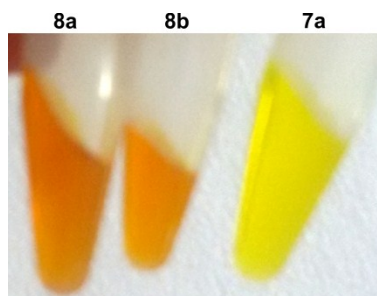

**Figure S6.** Visual appearance of **8a** and **8b** in comparison to **7a** showing bright orange color of these two complexes in comparison to yellow or pale yellow of all other complexes.

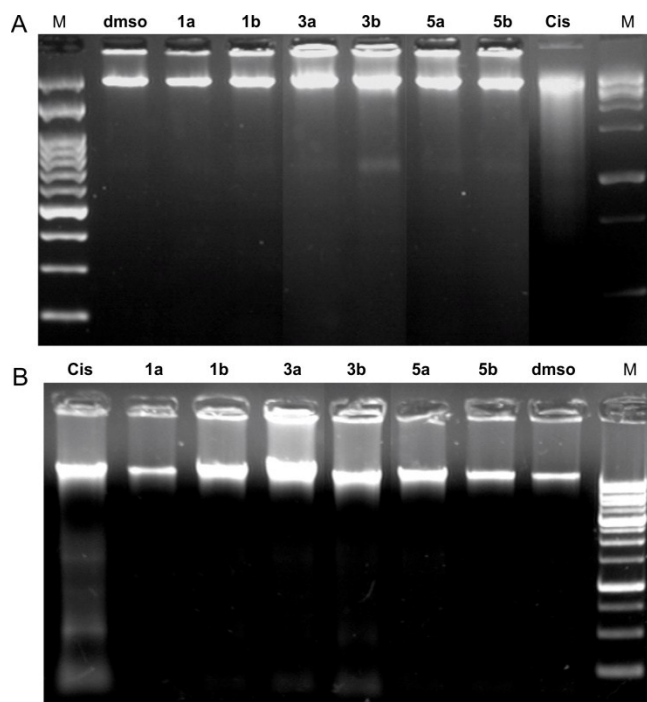

**Figure S7.** Cellular DNA degradation in **A)** carcinoma A549 cells and **B)** zebrafish embryos, induced by complexes **1a**, **1b**, **3a**, **3b**, **5a** and **5b** in comparison to cisplatin (**Cis**) and dmsol treated cells. DNA molecular weight marker in lane M (1 kb ladder, Nippon Genetics).

**Table S1: Compound nomenclature according to IUPAC recommendations.\***

| <b>Cpd</b>   | <i>Isomer</i> | <b>IUPAC</b> | <b>Cpd</b>   | <i>Isomer</i> | <b>IUPAC</b> |
|--------------|---------------|--------------|--------------|---------------|--------------|
| <b>1a-7a</b> | $\alpha$      | SP-4-4       | <b>1b-7b</b> | $\alpha$      | SP-4-4       |
|              | $\beta$       | SP-4-3       |              | $\beta$       | SP-4-3       |
| <b>8a</b>    | $\alpha$      | SP-4-3       | <b>8b</b>    | $\alpha$      | SP-4-4       |
|              | $\beta$       | SP-4-4       |              | $\beta$       | SP-4-2       |

\* In *Nomenclature of Inorganic Chemistry*, IUPAC Recommendations, ed. N. G. Connelly, T. Damhus, R. M. Hartshorn, A. T. Hutton, Royal Society of Chemistry, Cambridge, 2005, IR-9.3, 180.

**Table S2.** Crystallographic data for compounds  $\beta$ -1b,  $\alpha$ -2a, and  $\beta$ -2a.

| Compound                                            | $\beta$ -1b                                                         | $\alpha$ -2a·CH <sub>2</sub> Cl <sub>2</sub> *                                    | $\beta$ -2a*                                                        |
|-----------------------------------------------------|---------------------------------------------------------------------|-----------------------------------------------------------------------------------|---------------------------------------------------------------------|
| Empirical formula                                   | C <sub>15</sub> H <sub>16</sub> Cl <sub>2</sub> IN <sub>4</sub> OPt | C <sub>12</sub> H <sub>13</sub> Cl <sub>3</sub> N <sub>2</sub> O <sub>4</sub> PtS | C <sub>11</sub> H <sub>11</sub> ClN <sub>2</sub> O <sub>4</sub> PtS |
| M <sub>w</sub>                                      | 692.18                                                              | 582.74                                                                            | 497.82                                                              |
| T, K                                                | 150(2)                                                              | 150(2)                                                                            | 150(2)                                                              |
| Crystal system                                      | <i>Triclinic</i>                                                    | <i>Monoclinic</i>                                                                 | <i>Monoclinic</i>                                                   |
| Space group                                         | <i>P</i> -1                                                         | <i>C</i> 2/c                                                                      | <i>P</i> 2 <sub>1</sub> /m                                          |
| a, Å                                                | 5.810(5)                                                            | 19.3571(7) Å                                                                      | 9.4359(6)                                                           |
| b, Å                                                | 12.770(5)                                                           | 6.8349(3)                                                                         | 6.7378(4)                                                           |
| c, Å                                                | 12.865(5)                                                           | 25.1990(10)                                                                       | 10.5414(5)                                                          |
| $\alpha$ , deg.                                     | 84.543(5)                                                           | 90                                                                                | 90                                                                  |
| $\beta$ , deg.                                      | 81.308(5)                                                           | 95.245(4)                                                                         | 97.352(5)                                                           |
| $\gamma$ , deg.                                     | 78.412(5)                                                           | 90                                                                                | 90                                                                  |
| V, Å <sup>3</sup>                                   | 922.2(9)                                                            | 3320.0(2)                                                                         | 664.68(7)                                                           |
| Z                                                   | 2                                                                   | 8                                                                                 | 2                                                                   |
| D <sub>calc</sub> , g/cm <sup>3</sup>               | 2.493                                                               | 2.332                                                                             | 2.487                                                               |
| $\mu$ , mm <sup>-1</sup>                            | 9.670                                                               | 9.080                                                                             | 10.926                                                              |
| F(000)                                              | 644                                                                 | 2208                                                                              | 468                                                                 |
| Crystal size, mm                                    | 0.2×0.15×0.10                                                       | 0.25×0.25×0.20                                                                    | 0.15×0.05×0.05                                                      |
| Color                                               | yellow                                                              | orange                                                                            | yellow                                                              |
| Data collected / unique                             | 7153 / 4237                                                         | 7110 / 3800                                                                       | 3476 / 1655                                                         |
| R <sub>int</sub>                                    | 0.0271                                                              | 0.0250                                                                            | 0.0326                                                              |
| Restraints / parameters                             | 0 / 226                                                             | 0 / 208                                                                           | 0 / 118                                                             |
| S                                                   | 1.022                                                               | 1.047                                                                             | 1.103                                                               |
| R <sub>1</sub> , wR <sub>2</sub> [I>2 $\sigma$ (I)] | 0.0288 / 0.0544                                                     | 0.0248 / 0.0506                                                                   | 0.0384 / 0.0814                                                     |
| R <sub>1</sub> , wR <sub>2</sub> (all data)         | 0.0348 / 0.0580                                                     | 0.0295 / 0.0527                                                                   | 0.0429 / 0.0833                                                     |
| Larg. diff. peak/hole (e·Å <sup>-3</sup> )          | 1.452 / -1.359                                                      | 0.705 / -1.125                                                                    | 5.411 / -2.641                                                      |

\* for  $\alpha/\beta$  notations see Table 1.

**Table S3.** Crystallographic data for compounds  $\beta$ -**4b** and  $\beta$ -**6a**.

| Compound                                                              | $\beta$ - <b>4b</b>                                                  | (3· $\beta$ - <b>6a</b> )·acetone                                                                            |
|-----------------------------------------------------------------------|----------------------------------------------------------------------|--------------------------------------------------------------------------------------------------------------|
| Empirical formula                                                     | C <sub>15</sub> H <sub>16</sub> ClI <sub>2</sub> N <sub>4</sub> OPPt | C <sub>39</sub> H <sub>42</sub> Cl <sub>9</sub> N <sub>3</sub> O <sub>7</sub> Pt <sub>3</sub> S <sub>3</sub> |
| M <sub>w</sub>                                                        | 783.63                                                               | 1665.25                                                                                                      |
| T, K                                                                  | 150(2)                                                               | 150(2)                                                                                                       |
| Crystal system                                                        | <i>Triclinic</i>                                                     | <i>Monoclinic</i>                                                                                            |
| Space group                                                           | <i>P</i> -1                                                          | <i>P</i> 2 <sub>1</sub> /c                                                                                   |
| a, Å                                                                  | 5.8236(3)                                                            | 23.9829(5)                                                                                                   |
| b, Å                                                                  | 9.9683(6)                                                            | 10.1789(3)                                                                                                   |
| c, Å                                                                  | 17.4696(9)                                                           | 20.8153(5)                                                                                                   |
| $\alpha$ , deg.                                                       | 86.328(4)                                                            | 90                                                                                                           |
| $\beta$ , deg.                                                        | 88.630(4)                                                            | 103.822(2)                                                                                                   |
| $\gamma$ , deg.                                                       | 73.328(5)                                                            | 90                                                                                                           |
| V, Å <sup>3</sup>                                                     | 969.49(9)                                                            | 4934.3(2)                                                                                                    |
| Z                                                                     | 2                                                                    | 4                                                                                                            |
| D <sub>calc</sub> , g/cm <sup>3</sup>                                 | 2.684                                                                | 2.242                                                                                                        |
| $\mu$ , mm <sup>-1</sup>                                              | 10.653                                                               | 9.149                                                                                                        |
| F(000)                                                                | 716                                                                  | 3152                                                                                                         |
| Crystal size, mm                                                      | 0.15×0.05×0.05                                                       | 0.15×0.05×0.05                                                                                               |
| Color                                                                 | yellow                                                               | yellow                                                                                                       |
| Data collected / unique                                               | 7583 / 4435                                                          | 36804 / 11011                                                                                                |
| R <sub>int</sub>                                                      | 0.0323                                                               | 0.0403                                                                                                       |
| Restraints / parameters                                               | 0 / 226                                                              | 0 / 588                                                                                                      |
| S                                                                     | 1.011                                                                | 0.983                                                                                                        |
| R <sub>1</sub> , wR <sub>2</sub> [ <i>I</i> >2 $\sigma$ ( <i>I</i> )] | 0.0327 / 0.0599                                                      | 0.0247 / 0.0423                                                                                              |
| R <sub>1</sub> , wR <sub>2</sub> (all data)                           | 0.0422 / 0.0652                                                      | 0.0358 / 0.0448                                                                                              |
| Larg. diff. peak/hole (e·Å <sup>-3</sup> )                            | 2.258 / -1.579                                                       | 0.973 / -1.111                                                                                               |

\* for  $\alpha/\beta$  notations see Table 1.

**Table S4.** Instrument operating conditions for ICP-QMS

|                   |                   |
|-------------------|-------------------|
| Rf power (W)      | 1548              |
| Gas flows (L/min) | 13.9; 1.09; 0.8   |
| Acquisition time  | 3 x 50s           |
| Points per peak   | 3                 |
| Dwell time (ns)   | 10                |
| Detector mode     | Pulse             |
| Measured isotopes | <sup>194</sup> Pt |

**Table S5.** Lethal and teratogenic effects observed in zebrafish (*Danio rerio*) embryos at different hours post fertilization (hpf).

| Category           | Developmental endpoints                       | Exposure time (hpf) |    |    |    |
|--------------------|-----------------------------------------------|---------------------|----|----|----|
|                    |                                               | 24                  | 48 | 72 | 96 |
| Lethal effect      | Egg coagulation <sup>a</sup>                  | •                   | •  | •  | •  |
|                    | No somite formation                           | •                   | •  | •  | •  |
|                    | Tail not detached                             | •                   | •  | •  | •  |
|                    | No heart-beat                                 |                     | •  | •  | •  |
| Teratogenic effect | Malformation of head                          | •                   | •  | •  | •  |
|                    | Malformation of eyes <sup>b</sup>             | •                   | •  | •  | •  |
|                    | Malformation of sacculi/otoliths <sup>c</sup> | •                   | •  | •  | •  |
|                    | Malformation of chorda                        | •                   | •  | •  | •  |
|                    | Malformation of tail <sup>d</sup>             | •                   | •  | •  | •  |
|                    | Scoliosis                                     | •                   | •  | •  | •  |
|                    | Heart beat frequency                          |                     | •  | •  | •  |
|                    | Blood circulation                             |                     | •  | •  | •  |
|                    | Pericardial edema                             | •                   | •  | •  | •  |
|                    | Yolk edema                                    | •                   | •  | •  | •  |
|                    | Yolk deformation                              | •                   | •  | •  | •  |
|                    | Growth retardation <sup>e</sup>               | •                   | •  | •  | •  |

<sup>a</sup> No clear organs structure are recognized

<sup>b</sup> Malformation of eyes was recorded for the retardation in eye development and abnormality in shape and size.

<sup>c</sup> Presence of no, one or more than two otoliths per sacculus, as well as reduction and enlargement of otoliths and/or sacculi (otic vesicles).

<sup>d</sup> Tail malformation was recorded when the tail was bent, twisted or shorter than to control embryos as assessed by optical comparison.

<sup>e</sup> Growth retardation was recorded by comparing with the control embryos in development or size (before hatching, at 24 hpf and 48 hpf) or in a body length (after hatching, at and onwards 72 hpf) using by optical comparison using a inverted microscope (CKX41; Olympus, Tokyo, Japan).
